# Supplementary material for: Cylicins are a structural component of the sperm calyx being indispensable for male fertility in mice and human
Source: eLife journal article supplement (doi:10.7554/elife.86100), 2023-03-23
Supplement: fig1-data2 [file Pregnancy rate & litter size.xlsx]

## Sheet: pregnancy rate & litter size
litter size								genotype	WT		Cylc1 -/y		Cylc2 +/-		Cylc2 -/-		Cylc1 -/y Cylc2 +/-		Cylc1 -/y Cylc2 -/-
	WT	Cylc1 -/y	Cylc2 +/-	Cylc2 -/-	Cylc1 -/y Cylc2 +/-	Cylc1 -/y Cylc2 -/-			animal ID male	litter size	animal ID male	litter size	animal ID male	litter size	animal ID male	litter size	animal ID male	litter size	animal ID male	litter size
1	7	4	9	x	x	x			#6046	7	#6187	x	#4412	10	#4408	x	#7971	x	#9536	x
2	5	1	6.25	x	x	x			#6046	7	#6187	x	#4412	8	#4408	x	#7971	x	#9536	x
3	8	1.5	7.66667	x	x	x			#6046	7	#6187	x	#4412	9	#4408	x	#7971	x	#9536	x
4	7.25	x		x	x	x					#6187	x	#4412	9	#4408	x	#7971	x	#9536	x
5	8	x		x	x	x					#6187	4	#4412	9	#4408	x	#7971	x	#9536	x
								mean litter size		7		4		9		0		0		0
pregnancy rate								pregancy rate		1		0.2		0.8		0		0		0
	WT	Cylc1 -/y	Cylc2 +/-	Cylc2 -/-	Cylc1 -/y Cylc2 +/-	Cylc1 -/y Cylc2 -/-
1	1	0	0.8	0	0	0			#6045	x	#6186	x	#4409	x	#7541	x	#7935	x	#9190	x
2	0.5	0	1	0	0	0			#6045	x	#6186	x	#4409	7	#7541	x	#7935	x	#9190	x
3	0.4	0.2	0.6	0	0	0			#6045	2	#6186	x	#4409	8	#7541	x	#7935	x	#9190	x
4	0.8	0.2		0	0	0			#6045	8	#6186	x	#4409	1	#7541	x	#7935	x	#9190	x
5	1	0.4		0	0	0					#6186	1	#4409	9	#7541	x	#7935	x	#9190	x
								mean litter size		8		1		6.25		0		0		0
								pregancy rate		0.5		0.2		1		0		0		0
									#6257	x	#6389	x	#7540	x	#7583	x	#7975	x	#9150	x
									#6257	x	#6389	x	#7540	x	#7583	x	#7975	x	#9150	x
									#6257	x	#6389	x	#7540	8	#7583	x	#7975	x	#9150	x
									#6257	9	#6389	1	#7540	8	#7583	x	#7975	x	#9150	x
									#6257	7	#6389	2	#7540	7	#7583	x	#7975	x	#9150	x
								mean litter size		8		1.5		7.66667		0		0		0
								pregancy rate		0.4		0.4		0.6		0		0		0
									#2844	x	#6043	x			#7584	x	#7969	x	#9281	x
									#2844	8	#6043	x			#7584	x	#7969	x	#9281	x
									#2844	7	#6043	x			#7584	x	#7969	x	#9281	x
									#2844	7	#6043	x			#7584	x	#7969	x	#9281	x
									#2844	7	#6043	x			#7584	x	#7969	x	#9281	x
								mean litter size		7.25		0				0		0		0
								pregancy rate		0.8		0				0		0		0
									#2883	8	#6044	x			#7585	x	#7973	x	#9238	x
									#2883	8	#6044	x			#7585	x	#7973	x	#9238	x
									#2883	9	#6044	x			#7585	x	#7973	x	#9238	x
									#2883	8	#6044	x			#7585	x	#7973	x	#9238	x
									#2883	7	#6044	x			#7585	x	#7973	x	#9238	x
								mean litter size		8		0				0		0		0
								pregancy rate		1		0				0		0		0
