# Supplementary material for: Cylicins are a structural component of the sperm calyx being indispensable for male fertility in mice and human
Source: eLife journal article supplement (doi:10.7554/elife.86100), 2023-03-23
Supplement: fig2-data1 [file testis weight & sperm count.xlsx]

## Sheet: testis weight
	WT	Cylc1 -/y	Cylc2 +/-	Cylc2 -/-	Cylc1 -/y Cylc2 +/-	Cylc1 -/y Cylc2 -/-
1	0.09955	0.10485	0.1062	0.1066	0.09475	0.10395
2	0.11685	0.10135	0.11665	0.0911	0.11105	0.08195
3	0.09695	0.10225	0.11085	0.1109	0.091	0.0984
4	0.1021	0.1003	0.10925	0.0995	0.10475	0.09925
5	0.12975	0.0998	0.11185	0.0863	0.093
6	0.11465		0.10685	0.0987	0.10065
7	0.1085		0.10385	0.093	0.09035
8	0.10315		0.09475	0.10885	0.1013
9	0.09725		0.1009	0.12705	0.1036
10	0.10175		0.105	0.1063	0.10555
11	0.11745		0.0925	0.1108	0.10125
12			0.10725	0.1104
	WT	Cylc1 -/y	Cylc2 +/-	Cylc2 -/-	Cylc1 -/y Cylc2 +/-	Cylc1 -/y Cylc2 -/-
1	99.55	104.85	106.2	106.6	94.75	103.95
2	116.85	101.35	116.65	91.1	111.05	81.95
3	96.95	102.25	110.85	110.9	91	98.4
4	102.1	100.3	109.25	99.5	104.75	99.25
5	129.75	99.8	111.85	86.3	93
6	114.65		106.85	98.7	100.65
7	108.5		103.85	93	90.35
8	103.15		94.75	108.85	101.3
9	97.25		100.9	127.05	103.6
10	101.75		105	106.3	105.55
11	117.45		92.5	110.8	101.25
12			107.25	110.4

## Sheet: sperm count
	WT	Cylc1 -/y	Cylc2 +/-	Cylc2 -/-	Cylc1 -/y Cylc2 +/-	Cylc1 -/y Cylc2 -/-
1	2.885	1.905	2.7	1.63	1.625	0.82
2	3.235	2.5	2.965	1.88	1.685	0.54
3	3.74	2.035	2.905	2.145	1.77	0.785
4	4.8	2.845	2.62	0.925	1.875	0.58
5	4.42	2.02	3.09	1.6	1.45
6	6.44		2.165	1.75	0.945
7	6.255		2.87	1.18	1.2
8	3.55		3.57	2.065	1.365
9	3.325		2.05	1.645	1.725
10	4.11		2.01	0.99	1.675
11	4.235		1.955	1.225	1.595
12			1.81	0.865
