# Supplementary material for: Cylicins are a structural component of the sperm calyx being indispensable for male fertility in mice and human
Source: eLife journal article supplement (doi:10.7554/elife.86100), 2023-03-23
Supplement: fig2-data2 [file Sperm Viability.xlsx]

## Sheet: EN
Date of analysis	Date of birth	age (d)	age (m)	N	Lab ID	genotype	EN pos.	EN neg.	% pos	% neg
2021-05-04	2021-02-07	87	2	9	7444	WT	31	91	0.254098	0.745902
2021-06-10	2021-02-19	111	3		B6	WT	42	140	0.230769	0.769231
2021-08-03	2021-05-01	92	3	3	7731	WT	71	184	0.278431	0.721569
2021-07-19	2021-04-09	100	3		7633	WT	118	264	0.308901	0.691099				% EN positive cells	% alive cells
2021-08-03	2021-05-01	92	3	3	7732	WT	66	214	0.235714	0.764286			WT	0.255876	0.744124
2021-08-31	2021-03-06	175	5	3	7525	WT	65	165	0.282609	0.717391			Cylc1 Y/-	0.25789	0.74211
2022-01-31	2021-10-04	117	3		9191	WT	55	155	0.261905	0.738095			Cylc2+/-	0.299791	0.700209
2022-01-31	2021-10-04	117	3		9188	WT	88	222	0.283871	0.716129			Cylc2-/-	0.417179	0.582821
					6185	WT	65	241	0.212418	0.787582			Cylc1 Y/- Cylc2+/-	0.295928	0.704072
					6388	WT	46	173	0.210046	0.789954			Cylc1 Y/- Cylc2-/-	0.415857	0.584143
2021-05-04	2021-02-04	90	3	3	4412	C2 +/-	30	78	0.277778	0.722222
2021-09-01	2021-03-06	175	5	3	7526	C2 +/-	103	193	0.347973	0.652027
2021-08-31	2021-03-06	175	5	3	7524	C2 +/-	40	82	0.327869	0.672131
2021-08-04	2021-05-03	91	3	3	7737	C2 +/-	102	273	0.272	0.728
2021-08-31	2021-03-06	175	5	3	7523	C2 +/-	62	147	0.296651	0.703349
2021-08-31	2021-03-06	175	5	3	7522	C2 +/-	82	176	0.317829	0.682171
2021-07-19	2021-04-09	100	3	3	7667	C2 +/-	94	228	0.291925	0.708075
2021-06-10	2021-02-25	105	3	3	7540	C2 +/-	49	135	0.266304	0.733696
2021-08-04	2021-05-03	91	3	3	7739	C2 -/-	169	209	0.44709	0.55291
2021-08-04	2021-05-03	91	3	3	7738	C2 -/-	112	175	0.390244	0.609756
2021-09-01	2021-03-06	175	5	3	7527	C2 -/-	134	166	0.446667	0.553333
2021-09-01	2021-03-06	175	5	3	7528	C2 -/-	126	200	0.386503	0.613497
2021-07-19	2021-04-09	100	3	3	7668	C2 -/-	131	165	0.442568	0.557432
2021-05-04	2021-02-04	90	3	3	4408	C2 -/-	39	61	0.39	0.61
					6186	C1 Y/-	53	151	0.259804	0.740196
					6187	C1 Y/-	62	179	0.257261	0.742739
					6389	C1 Y/-	68	197	0.256604	0.743396
2021-11-30	2021-07-11	139	4	6	7973	C1 Y/-; C2 +/-	97	205	0.321192	0.678808
2022-01-05	2021-09-20	105	3		9151	C1 Y/-; C2 +/-	131	280	0.318735	0.681265
2022-01-19	2021-10-13	96	3		9235	C1 Y/-; C2 +/-	68	167	0.289362	0.710638
2021-11-08	2021-07-11	117	3	6	7971	C1 Y/-; C2 +/-	98	264	0.270718	0.729282
2021-11-30	2021-07-11	139	4	6	7969	C1 Y/-; C2 +/-	92	237	0.279635	0.720365
2022-01-19	2021-10-13	96	3		9238	C1 Y/-; C2 -/-	117	177	0.397959	0.602041
2022-01-31	2021-10-04	117	3		9190	C1 Y/-; C2 -/-	105	154	0.405405	0.594595
2022-01-05	2021-09-20	105	3		9150	C1 Y/-; C2 -/-	207	259	0.444206	0.555794
