# Supplementary material for: Cylicins are a structural component of the sperm calyx being indispensable for male fertility in mice and human
Source: eLife journal article supplement (doi:10.7554/elife.86100), 2023-03-23
Supplement: fig2-data4 [file Acrosome_Flagellum.xlsx]

## Sheet: flagellum
WT	#7924	WT	#7732	WT	#7525	Cylc1 -/y	#7970	Cylc1 -/y	#7936	Cylc1 -/y	#9350	Cylc2+/-	#9593	Cylc2+/-	#9473	Cylc2+/-	#9594	Cylc2 Ko	#9493	Cylc2 Ko	#7585	Cylc2 Ko	#9079	C1-;C2+-	#9472	C1-;C2+-	#7973	C1-;C2+-	#9336	dbKO	#9536	dbKO	#9659	dbKO	#9595
normal	wrapped	normal	wrapped	normal	wrapped	normal	wrapped	normal	wrapped	normal	wrapped	normal	wrapped	normal	wrapped	normal	wrapped	normal	wrapped	normal	wrapped	normal	wrapped	normal	wrapped	normal	wrapped	normal	wrapped	normal	wrapped	normal	wrapped	normal	wrapped
3	1	4	0	1	0	8	0	2	0	1	0	2	0	5	1	3	1	0	1	1	2	1	1	0	2	2	2	4	0	0	4	0	5	0	5
2	1	1	0	3	0	3	1	1	1	1	0	2	0	4	1	2	0	0	1	0	2	0	1	0	4	3	1	1	3	1	4	1	4	0	3
1	0	2	0	1	1	4	2	2	0	2	0	1	0	6	0	1	0	0	1	0	2	1	2	1	2	3	5	4	3	0	2	1	1	1	3
2	0	1	0	1	0	6	1	1	0	2	1	2	2	2	1	1	2	0	1	0	3	1	3	0	1	1	3	1	4	0	2	0	1	0	2
1	1	1	1	4	0	8	0	2	0	1	1	4	1	0	1	3	1	0	1	1	0	0	1	0	1	1	2	3	4	1	3	0	2	0	1
2	0	1	0	1	0	5	1	1	0	3	0	5	2	1	1	2	1	1	3	0	3	0	1	0	2	2	4	1	2	0	1	0	5	0	1
2	0	1	0	3	1	12	1	1	0	1	0	2	1	1	0	3	0	0	1	0	1	1	3	1	0	1	2	2	2	0	2	0	1	0	3
1	0	3	1	2	1	3	0	1	0	3	1	3	0	1	0	2	0	0	1	0	2	0	1	1	1	0	2	1	2	0	1	0	1	0	1
1	0	1	1	1	0	2	2	5	1	7	2	1	1	2	1	1	0	1	1	0	1	0	3	1	0	1	2	1	1	0	2	0	1	1	4
1	1	2	0	2	0	1	1	7	0	10	1	1	0	5	0	2	0	0	1	1	0	1	1	1	0	2	3	0	2	0	1	1	1	0	4
3	0	3	1	2	0	2	0	2	0	4	1	2	0	8	2	5	0	0	3	0	3	0	1	2	0	0	3	0	3	0	1	0	3	0	3
2	1	2	0	3	0	3	0	2	0	3	0	1	0	9	3	1	0	0	2	0	2	1	3	1	3	1	4	2	5	0	1	1	4	0	1
3	1	3	0	1	1	1	0	3	0	6	1	3	0	5	1	1	0	3	1	0	1	0	1	0	1	1	5	0	3	0	1	0	4	1	3
2	0	3	0	3	1	4	0	2	1	7	2	3	1	7	3	0	1	0	1	0	1	1	1	0	1	0	3	3	4	1	5	0	5	0	4
1	1	1	1	2	0	2	1	2	0	5	3	2	0	5	1	3	1	0	1	0	4	0	1	0	1	1	2	1	4	0	1	0	2	0	5
1	0	4	1	0	1	1	0	1	0	13	4	4	2	3	0	7	3	0	1	0	2	0	1	0	1	2	4	2	2	0	4	0	3	0	1
3	1	3	1	2	0	0	1	3	1	5	2	5	0	2	0	1	0	0	1	0	1	1	1	1	0	0	3	0	3	0	2	1	3	0	2
2	1	1	0	3	1	3	0	4	0	1	3	3	1	0	1	1	0	1	1	0	1	0	2	0	1	0	2	1	6	0	3	0	4	0	1
1	0	1	1	5	1	3	0	2	0	10	1	3	1	4	1	1	1	0	1	1	3	1	3	1	0	0	3	0	3	0	3	0	2	0	2
2	0	1	0	6	0	5	1	3	0	6	1	1	0	2	0	3	1	1	1	0	1	1	1	0	1	1	2	3	2	1	0	0	1	0	2
1	1	3	0	3	0	1	0	2	1			1	0	1	1	3	0	1	1	1	2	0	1	1	0	1	0	1	2	0	1	0	1	0	1
3	0	3	0	4	1	1	0	2	0			3	0	3	1	1	1	0	1	1	2	0	2	3	0	0	2	0	1	0	3	0	1	0	5
2	0	2	1	4	1	4	0	4	1			2	1	2	2	4	1	0	1	0	2	0	1	1	0	2	7	1	1	0	4	0	1	0	3
2	1	4	1	3	2	3	1	4	3			1	0	4	0	2	1	0	1	0	2	0	2	2	0	0	1	3	4	0	2	0	1	0	4
2	0	3	1	2	1	2	0	5	1			1	1	3	1	3	0	1	2	0	2	0	1	1	0	2	5	0	4	1	4	0	1	0	2
2	1	5	0	2	1	1	0	4	1			4	0	6	2	2	0	0	1	1	1	1	0	0	1	2	2	1	3	0	2	0	1	0	3
1	1	3	0	2	0	5	1	3	2			2	0	7	1	0	1	1	2	0	1	1	1	0	1	1	3	2	0	1	4	0	2	1	3
3	0	5	0	1	1	7	2					7	2	3	0	2	1	0	1	1	0	0	2	0	5	0	1	0	5	0	1	1	3	0	3
2	1	1	0	1	0	1	0					6	1	1	1	1	0	0	1	0	1	1	2	0	1	0	2	0	1	0	1	0	3	1	2
3	1	6	0	8	1	1	0					8	3	2	1	3	0	0	1	0	1	0	2	0	2	0	1	1	1	0	1	0	3	0	3
5	0	4	0	4	0	3	0					5	1	1	0	4	1	0	2	0	1	0	1	0	1	1	4	2	4	0	1	0	2	0	1
3	0	2	1	5	1	2	0					3	0	4	0	7	1	1	3	0	1	0	3	0	1	1	1	0	1	0	1	0	3	0	3
3	0	7	1	3	0	1	0					2	2	1	0	4	0	0	1	1	3	0	1	0	1	2	0	0	2	0	1	0	2	0	4
2	0	5	1	6	1	1	0					3	0			6	2	0	1	1	0	0	2	0	2	0	1	2	0	0	1	0	3	1	2
1	0	4	0	8	1	2	0					2	0			4	0	0	1	0	1	0	2	0	3	0	1	1	2	0	1	0	1	0	2
1	0	2	1	2	1	3	1					1	0			2	0	0	1	0	1	0	1	0	1	1	2	0	2	0	1	1	3	0	3
1	0	3	0	3	0	2	0					2	0			1	1	1	0	0	1	0	2	1	1	1	4	0	1	0	1	0	1	1	3
1	1	4	0	5	0	3	2					1	0			2	0	0	1	1	1	1	2	0	1			0	1	0	1	0	1	0	2
2	0	2	0	5	0	1	1									1	1	0	1	0	1	1	3	0	3			3	3	1	1	0	2	0	2
1	0	0	1	4	1	1	1									3	1	1	1	0	1	0	1	2	2			0	2	0	1	0	3	0	1
6	1					1	2									2	0	0	1	0	1	0	1	1	2			0	1	0	1	0	2	0	2
9	1					0	1											1	4	1	1	1	1	1	2			1	4	0	1	0	1	0	1
																		0	1	0	1	0	1	1	2			4	4	1	1	0	1	0	1
																		0	1	1	1	0	1	0	2					0	1	0	1	0	2
																		2	1	0	1	1	2	1	4					0	1	0	2	1	1
																		0	1	0	1	0	1	0	2					0	1	0	1	0	1
92	18	107	16	121	21	122	24	71	13	91	24	104	23	110	28	100	24	0	1	1	2	1	1	1	1					1	0	0	3	0	1
0.836364	0.163636	0.869919	0.130081	0.852113	0.147887	0.835616	0.164384	0.845238	0.154762	0.791304	0.208696	0.818898	0.181102	0.797101	0.202899	0.806452	0.193548	1	1	0	1	1	2	2	1					0	2	0	2	0	1
																		0	1	1	2	1	0	0	1					0	4	0	1	0	1
																		0	1	0	2	0	1	0	1					0	3	0	1	0	1
																		0	3	1	1	1	1	0	3					0	2	0	2
																		0	1	1	0	0	2	1	1					1	5	1	2
																		0	2	0	1	0	1	0	3					0	2	0	3
																		0	1	1	3	1	1	1	1					0	1	0	3
																		1	1	0	1	0	3	1	3					0	1
																		0	1	0	1	0	2	2	1
																		0	2	1	1	0	1	1	3
																		1	4	0	2	2	0
																		0	1	0	1
																		0	1	1	2
																		0	1
																		0	2
																		1	1
																		20	83	20	86	24	86	34	81	36	94	52	107	10	102	8	116	8	115
																		0.194175	0.805825	0.188679	0.811321	0.218182	0.781818	0.295652	0.704348	0.276923	0.723077	0.327044	0.672956	0.0892857	0.910714	0.0645161	0.935484	0.0650407	0.934959

## Sheet: acrosome
WT	#7924	WT	#7732	WT	#7525	Cylc1 -/y	#7970	Cylc1 -/y	#7936	Cylc1 -/y	#9350	Cylc2+/-	#9593	Cylc2+/-	#9473	Cylc2+/-	#9594	Cylc2 Ko	#9493	Cylc2 Ko	#7585	Cylc2 Ko	#9079	C1-;C2+-	#9472	C1-;C2+-	#7973	C1-;C2+-	#9336	dbKO	#9536	dbKO	#9659	dbKO	#9595
normal	abnormal	normal	abnormal	normal	abnormal	normal	abnormal	normal	abnormal	normal	abnormal	normal	abnormal	normal	abnormal	normal	abnormal	normal	abnormal	normal	abnormal	normal	abnormal	normal	abnormal	normal	abnormal	normal	abnormal	normal	abnormal	normal	abnormal	normal	abnormal
4	1	3	2	1	0	2	1	2	1	1	0	4	1	4	1	3	1	0	2	0	2	1	1	1	0	2	2	3	1	0	1	0	5	0	5
2	1	1	0	0	1	2	1	1	1	1	0	1	0	3	2	2	0	0	6	0	2	0	1	0	2	3	1	1	3	0	1	1	4	0	3
1	0	2	0	1	1	1	3	0	2	2	0	1	0	5	1	1	0	0	1	1	1	2	1	1	0	3	5	3	4	1	1	0	2	1	3
2	0	1	0	1	0	1	0	1	0	2	1	1	0	2	1	1	2	0	1	2	1	1	3	0	1	1	3	2	3	0	1	0	1	0	2
2	0	1	1	3	3	5	4	2	0	1	1	5	0	0	1	3	1	0	1	0	1	0	1	0	2	1	2	3	4	0	1	0	2	0	1
2	0	1	0	1	0	2	3	1	1	3	0	2	0	1	1	2	1	1	0	2	1	0	1	1	4	2	4	2	1	0	1	1	4	0	1
2	0	1	0	3	1	3	4	0	1	1	0	2	0	1	0	3	0	1	0	0	1	1	3	0	1	1	2	2	2	0	1	0	1	1	2
1	0	3	1	2	1	2	2	1	3	2	2	6	2	1	0	1	1	0	1	1	1	0	1	0	1	0	2	1	2	0	1	0	1	0	1
1	0	1	0	1	0	0	1	5	1	5	4	4	1	2	1	1	0	0	1	0	1	0	3	0	1	1	2	1	1	0	1	0	1	1	4
1	1	2	0	3	0	4	3	6	1	8	3	5	1	4	1	2	0	0	1	1	0	0	2	0	1	2	3	0	2	0	1	1	1	0	4
2	1	3	1	2	0	5	5	3	2	3	2	4	0	8	2	5	0	0	2	1	2	0	1	0	1	0	3	1	2	0	1	0	3	0	3
3	0	2	1	1	0	3	1	1	2	2	1	7	2	10	2	1	0	0	1	1	1	1	3	1	0	1	4	2	5	0	1	0	5	0	1
3	1	3	1	0	1	4	0	4	2	5	2	3	0	5	1	1	0	1	0	0	1	0	1	1	1	1	5	1	2	0	4	0	4	0	4
2	0	3	0	4	0	5	2	2	1	4	5	4	0	7	3	0	1	1	0	0	1	0	2	0	1	0	3	3	4	2	2	0	5	0	4
1	2	1	1	2	1	7	2	2	0	4	4	3	0	5	1	3	1	0	1	1	3	0	1	1	0	1	2	2	3	0	2	0	2	0	5
1	0	3	2	0	1	3	2	0	1	8	9	4	0	3	0	6	4	1	0	0	2	0	1	1	2	2	4	2	2	0	3	0	3	0	1
2	2	3	1	2	2	9	5	4	3	5	2	4	1	1	1	1	0	0	1	0	1	1	1	1	0	0	3	0	3	0	1	0	4	0	2
2	1	1	0	3	1	3	0	4	2	3	1	4	1	0	1	1	0	1	1	0	1	0	2	1	1	0	2	1	6	0	1	1	3	0	1
1	0	2	1	6	1	2	0	2	3	8	3	3	0	4	1	1	1	1	0	2	2	2	2	0	1	0	3	0	3	1	1	0	2	1	1
2	0	1	0	5	1	1	0	3	1	4	3	1	1	2	0	3	1	0	1	0	1	1	1	1	0	0	3	2	3	1	2	0	1	0	2
1	1	3	0	3	0	2	0	2	3			4	0	1	1	2	1	1	1	0	2	0	1	0	1	1	0	1	2	1	1	0	1	0	1
1	0	4	1	4	2	2	1	2	4			4	1	3	1	1	1	0	1	0	2	0	2	1	4	1	1	0	1	0	1	0	1	0	5
2	0	2	0	5	0	0	1	5	0			3	0	1	3	3	2	0	1	1	1	0	1	1	0	3	6	1	1	0	1	0	1	0	3
2	1	4	1	3	2	3	1	4	3			2	0	3	1	2	1	1	1	0	2	0	2	1	1	0	1	3	4	1	0	0	1	0	4
2	0	3	1	2	2	2	1	5	1			2	3	1	3	3	0	0	1	0	2	0	1	0	1	1	6	0	4	0	4	0	1	0	2
2	1	4	1	2	1	1	0	4	1			4	1	5	3	1	1	0	2	1	1	1	0	0	1	2	2	1	3	1	2	0	1	0	3
1	0	3	0	3	1	1	0	4	1			7	2	6	2	0	1	0	2	0	1	0	2	0	1	1	3	1	1	1	5	0	2	0	4
2	1	3	2	2	0	1	2					5	6	3	0	1	2	0	1	0	1	0	2	0	2	1	0	0	5	0	3	1	3	0	3
2	1	1	0	1	0	1	2					4	3	2	0	1	0	0	1	1	0	0	3	0	3	1	1	0	1	0	2	0	3	0	3
2	1	7	2	7	2	2	4					3	1	2	1	2	1	1	0	0	1	1	1	0	1	0	1	1	1	0	4	0	3	1	2
5	1	4	0	4	0	1	0					1	2	1	0	4	1	0	2	0	1	0	1	2	0	1	4	2	4	0	4	0	2	0	1
3	0	4	1	5	2	1	0					1	0	2	3	6	2	0	1	0	1	1	2	0	1	1	1	0	1	0	2	1	2	1	2
3	1	7	1	3	0	2	2					1	3	1	0	4	0	1	0	3	1	0	1	0	2	1	1	0	2	0	3	0	2	0	4
2	0	5	2	6	1	0	3					1	0			4	4	0	1	0	1	0	2	2	2	0	1	1	1	0	2	0	3	0	3
1	0	3	1	8	1	2	0					3	2			3	1	1	2	1	0	0	2	1	2	0	1	1	2	0	1	0	1	0	2
1	0	2	1	2	1	1	0					3	0			2	0	1	0	0	1	0	1	2	1	1	2	0	2	1	1	1	3	0	3
2	0	3	0	3	0	2	4					2	1			1	1	0	1	0	1	0	2	1	2	1	4	0	1	0	2	0	1	1	3
1	1	3	1	5	0	4	5					3	5			2	0	1	1	1	1	0	3	0	2	1	1	0	1	0	4	0	1	0	2
2	0	2	0	5	2	1	0					4	4			1	1	0	1	0	1	2	2	0	2	2	2	1	5	0	5	0	2	0	2
1	0	1	1	4	1	1	0					3	3			3	1	0	1	0	1	0	1	2	2	1	2	0	2	0	2	0	3	0	1
6	1	3	1	2	1	1	2					2	3			2	0	1	1	0	1	0	1	2	3	2	1	1	0	0	4	1	1	0	2
8	2	2	0	3	0	3	0					1	0					1	2	1	1	1	1	0	3	0	3	1	4	0	2	0	1	0	1
						1	0					1	0					0	1	0	1	0	1	0	1	0	2	2	6	0	4	0	1	0	1
89	22	111	29	123	34	1	0											0	3	0	2	0	1	0	1	1	1			0	1	0	1	1	1
0.801802	0.198198	0.792857	0.207143	0.783439	0.216561	1	1											0	1	0	1	0	3	0	2	1	3			1	0	0	2	1	1
						98	67	70	41	72	43	131	50	99	39	89	35	0	1	0	1	0	1	1	2	1	1			0	1	0	1	0	1
						0.593939	0.406061	0.630631	0.369369	0.626087	0.373913	0.723757	0.33557	0.717391	0.282609	0.717742	0.282258	1	0	1	2	0	2			0	1			1	0	1	2	0	1
																		0	1	0	1	2	1			3	1			0	1	0	2	0	1
																		1	1	0	3	1	0			1	1			0	3	0	1	0	1
																		0	3	1	1	0	1			2	0			0	1	0	1	0	1
																		0	2	0	2	0	2							0	3	0	2
																		0	0	0	1	1	1							0	4	0	3
																		1	0	0	1	0	1							0	1	0	3
																		1	0	1	3	1	1							0	2	1	2
																		0	3	0	1	2	1							0	3
																		0	1	0	1	0	2							0	5
																		1	3	1	1	0	1							0	3
																		0	1	0	2	1	1
																		0	1	0	1
																		1	0	2	1
																		1	2					26	63	52	112	49	110	12	115	10	114	9	114
																		0	2					0.292135	0.707865	0.317073	0.682927	0.308176	0.691824	0.0944882	0.905512	0.0806452	0.919355	0.0731707	0.926829
																		2	1
																		1	2
																		0	1
																		1	0
																		0	5
																		27	80	27	76	24	86
																		0.252336	0.747664	0.262136	0.737864	0.218182	0.781818
