# Supplementary material for: Cylicins are a structural component of the sperm calyx being indispensable for male fertility in mice and human
Source: eLife journal article supplement (doi:10.7554/elife.86100), 2023-03-23
Supplement: fig2-data5 [file Sperm head morphology.xlsx]

## Sheet: Circularity
WT_0	Circularity	Raw_value	0.380038	Cylc1 KO_1	0.242968		Cylc2 +-_2	0.35295		Cylc2 KO_3	0.299327		Cylc1 Y- Cylc2+-_4	0.32134		dbKO_5	0.331823
WT_0	Circularity	Raw_value	0.456905	Cylc1 KO_1	0.351818		Cylc2 +-_2	0.402682		Cylc2 KO_3	0.42646		Cylc1 Y- Cylc2+-_4	0.342753		dbKO_5	0.420444
WT_0	Circularity	Raw_value	0.474028	Cylc1 KO_1	0.378557		Cylc2 +-_2	0.407814		Cylc2 KO_3	0.459267		Cylc1 Y- Cylc2+-_4	0.352419		dbKO_5	0.441028
WT_0	Circularity	Raw_value	0.478061	Cylc1 KO_1	0.445801		Cylc2 +-_2	0.412902		Cylc2 KO_3	0.474049		Cylc1 Y- Cylc2+-_4	0.368461		dbKO_5	0.48253
WT_0	Circularity	Raw_value	0.478804	Cylc1 KO_1	0.50245		Cylc2 +-_2	0.416019		Cylc2 KO_3	0.476952		Cylc1 Y- Cylc2+-_4	0.368979		dbKO_5	0.482645
WT_0	Circularity	Raw_value	0.50272	Cylc1 KO_1	0.503606		Cylc2 +-_2	0.443697		Cylc2 KO_3	0.507512		Cylc1 Y- Cylc2+-_4	0.424319		dbKO_5	0.508183
WT_0	Circularity	Raw_value	0.503914	Cylc1 KO_1	0.503776		Cylc2 +-_2	0.461553		Cylc2 KO_3	0.507521		Cylc1 Y- Cylc2+-_4	0.479291		dbKO_5	0.509515
WT_0	Circularity	Raw_value	0.508729	Cylc1 KO_1	0.506841		Cylc2 +-_2	0.472273		Cylc2 KO_3	0.513337		Cylc1 Y- Cylc2+-_4	0.486151		dbKO_5	0.512084
WT_0	Circularity	Raw_value	0.511427	Cylc1 KO_1	0.514716		Cylc2 +-_2	0.4782		Cylc2 KO_3	0.520018		Cylc1 Y- Cylc2+-_4	0.490832		dbKO_5	0.514326
WT_0	Circularity	Raw_value	0.51172	Cylc1 KO_1	0.515153		Cylc2 +-_2	0.499283		Cylc2 KO_3	0.522611		Cylc1 Y- Cylc2+-_4	0.499138		dbKO_5	0.514575
WT_0	Circularity	Raw_value	0.51264	Cylc1 KO_1	0.520728		Cylc2 +-_2	0.501903		Cylc2 KO_3	0.523025		Cylc1 Y- Cylc2+-_4	0.5001		dbKO_5	0.516032
WT_0	Circularity	Raw_value	0.513657	Cylc1 KO_1	0.522192		Cylc2 +-_2	0.502318		Cylc2 KO_3	0.526875		Cylc1 Y- Cylc2+-_4	0.50102		dbKO_5	0.517787
WT_0	Circularity	Raw_value	0.516291	Cylc1 KO_1	0.522206		Cylc2 +-_2	0.502595		Cylc2 KO_3	0.534557		Cylc1 Y- Cylc2+-_4	0.502248		dbKO_5	0.522459
WT_0	Circularity	Raw_value	0.517277	Cylc1 KO_1	0.523137		Cylc2 +-_2	0.507763		Cylc2 KO_3	0.535252		Cylc1 Y- Cylc2+-_4	0.503496		dbKO_5	0.524092
WT_0	Circularity	Raw_value	0.517629	Cylc1 KO_1	0.523777		Cylc2 +-_2	0.514235		Cylc2 KO_3	0.536079		Cylc1 Y- Cylc2+-_4	0.505552		dbKO_5	0.52463
WT_0	Circularity	Raw_value	0.519826	Cylc1 KO_1	0.528176		Cylc2 +-_2	0.515026		Cylc2 KO_3	0.536409		Cylc1 Y- Cylc2+-_4	0.506268		dbKO_5	0.52679
WT_0	Circularity	Raw_value	0.520218	Cylc1 KO_1	0.528728		Cylc2 +-_2	0.515201		Cylc2 KO_3	0.537274		Cylc1 Y- Cylc2+-_4	0.509175		dbKO_5	0.532218
WT_0	Circularity	Raw_value	0.520384	Cylc1 KO_1	0.529312		Cylc2 +-_2	0.515658		Cylc2 KO_3	0.539154		Cylc1 Y- Cylc2+-_4	0.510107		dbKO_5	0.533363
WT_0	Circularity	Raw_value	0.523734	Cylc1 KO_1	0.529586		Cylc2 +-_2	0.517071		Cylc2 KO_3	0.53933		Cylc1 Y- Cylc2+-_4	0.511918		dbKO_5	0.533531
WT_0	Circularity	Raw_value	0.524025	Cylc1 KO_1	0.530516		Cylc2 +-_2	0.51718		Cylc2 KO_3	0.539808		Cylc1 Y- Cylc2+-_4	0.512102		dbKO_5	0.534067
WT_0	Circularity	Raw_value	0.525704	Cylc1 KO_1	0.531559		Cylc2 +-_2	0.517555		Cylc2 KO_3	0.539919		Cylc1 Y- Cylc2+-_4	0.513872		dbKO_5	0.535215
WT_0	Circularity	Raw_value	0.527287	Cylc1 KO_1	0.531685		Cylc2 +-_2	0.522644		Cylc2 KO_3	0.540667		Cylc1 Y- Cylc2+-_4	0.51405		dbKO_5	0.535948
WT_0	Circularity	Raw_value	0.527594	Cylc1 KO_1	0.532904		Cylc2 +-_2	0.522942		Cylc2 KO_3	0.544458		Cylc1 Y- Cylc2+-_4	0.515122		dbKO_5	0.536438
WT_0	Circularity	Raw_value	0.527947	Cylc1 KO_1	0.533039		Cylc2 +-_2	0.523439		Cylc2 KO_3	0.551147		Cylc1 Y- Cylc2+-_4	0.516111		dbKO_5	0.537063
WT_0	Circularity	Raw_value	0.528309	Cylc1 KO_1	0.534773		Cylc2 +-_2	0.524491		Cylc2 KO_3	0.555451		Cylc1 Y- Cylc2+-_4	0.51692		dbKO_5	0.537805
WT_0	Circularity	Raw_value	0.528865	Cylc1 KO_1	0.535626		Cylc2 +-_2	0.525521		Cylc2 KO_3	0.557659		Cylc1 Y- Cylc2+-_4	0.517583		dbKO_5	0.538054
WT_0	Circularity	Raw_value	0.529817	Cylc1 KO_1	0.535898		Cylc2 +-_2	0.525617		Cylc2 KO_3	0.558303		Cylc1 Y- Cylc2+-_4	0.518156		dbKO_5	0.538132
WT_0	Circularity	Raw_value	0.530358	Cylc1 KO_1	0.537436		Cylc2 +-_2	0.525787		Cylc2 KO_3	0.563834		Cylc1 Y- Cylc2+-_4	0.518377		dbKO_5	0.538151
WT_0	Circularity	Raw_value	0.530521	Cylc1 KO_1	0.538651		Cylc2 +-_2	0.526007		Cylc2 KO_3	0.565996		Cylc1 Y- Cylc2+-_4	0.51853		dbKO_5	0.539454
WT_0	Circularity	Raw_value	0.530675	Cylc1 KO_1	0.538898		Cylc2 +-_2	0.527308		Cylc2 KO_3	0.566117		Cylc1 Y- Cylc2+-_4	0.51898		dbKO_5	0.544328
WT_0	Circularity	Raw_value	0.530822	Cylc1 KO_1	0.539062		Cylc2 +-_2	0.528444		Cylc2 KO_3	0.566235		Cylc1 Y- Cylc2+-_4	0.519147		dbKO_5	0.545366
WT_0	Circularity	Raw_value	0.531106	Cylc1 KO_1	0.539624		Cylc2 +-_2	0.528655		Cylc2 KO_3	0.569403		Cylc1 Y- Cylc2+-_4	0.519923		dbKO_5	0.545402
WT_0	Circularity	Raw_value	0.533029	Cylc1 KO_1	0.539807		Cylc2 +-_2	0.529038		Cylc2 KO_3	0.570201		Cylc1 Y- Cylc2+-_4	0.522394		dbKO_5	0.545873
WT_0	Circularity	Raw_value	0.533806	Cylc1 KO_1	0.540434		Cylc2 +-_2	0.529096		Cylc2 KO_3	0.570692		Cylc1 Y- Cylc2+-_4	0.52441		dbKO_5	0.547059
WT_0	Circularity	Raw_value	0.53384	Cylc1 KO_1	0.540515		Cylc2 +-_2	0.529705		Cylc2 KO_3	0.574202		Cylc1 Y- Cylc2+-_4	0.52532		dbKO_5	0.549102
WT_0	Circularity	Raw_value	0.534336	Cylc1 KO_1	0.541069		Cylc2 +-_2	0.530177		Cylc2 KO_3	0.574354		Cylc1 Y- Cylc2+-_4	0.525402		dbKO_5	0.550443
WT_0	Circularity	Raw_value	0.535384	Cylc1 KO_1	0.542039		Cylc2 +-_2	0.533482		Cylc2 KO_3	0.574594		Cylc1 Y- Cylc2+-_4	0.525433		dbKO_5	0.551271
WT_0	Circularity	Raw_value	0.535501	Cylc1 KO_1	0.542194		Cylc2 +-_2	0.534062		Cylc2 KO_3	0.575512		Cylc1 Y- Cylc2+-_4	0.528702		dbKO_5	0.551391
WT_0	Circularity	Raw_value	0.536001	Cylc1 KO_1	0.542628		Cylc2 +-_2	0.534127		Cylc2 KO_3	0.576642		Cylc1 Y- Cylc2+-_4	0.528923		dbKO_5	0.551971
WT_0	Circularity	Raw_value	0.538644	Cylc1 KO_1	0.543795		Cylc2 +-_2	0.534528		Cylc2 KO_3	0.57666		Cylc1 Y- Cylc2+-_4	0.530345		dbKO_5	0.552253
WT_0	Circularity	Raw_value	0.539224	Cylc1 KO_1	0.5453		Cylc2 +-_2	0.535298		Cylc2 KO_3	0.577494		Cylc1 Y- Cylc2+-_4	0.53037		dbKO_5	0.556396
WT_0	Circularity	Raw_value	0.539765	Cylc1 KO_1	0.545393		Cylc2 +-_2	0.53538		Cylc2 KO_3	0.577941		Cylc1 Y- Cylc2+-_4	0.531159		dbKO_5	0.556546
WT_0	Circularity	Raw_value	0.541784	Cylc1 KO_1	0.545596		Cylc2 +-_2	0.535526		Cylc2 KO_3	0.581128		Cylc1 Y- Cylc2+-_4	0.531848		dbKO_5	0.556787
WT_0	Circularity	Raw_value	0.54192	Cylc1 KO_1	0.545694		Cylc2 +-_2	0.536236		Cylc2 KO_3	0.581611		Cylc1 Y- Cylc2+-_4	0.533798		dbKO_5	0.55839
WT_0	Circularity	Raw_value	0.542133	Cylc1 KO_1	0.545958		Cylc2 +-_2	0.536245		Cylc2 KO_3	0.585505		Cylc1 Y- Cylc2+-_4	0.534249		dbKO_5	0.558917
WT_0	Circularity	Raw_value	0.543109	Cylc1 KO_1	0.546278		Cylc2 +-_2	0.537546		Cylc2 KO_3	0.585853		Cylc1 Y- Cylc2+-_4	0.534615		dbKO_5	0.559842
WT_0	Circularity	Raw_value	0.543456	Cylc1 KO_1	0.547048		Cylc2 +-_2	0.538103		Cylc2 KO_3	0.586982		Cylc1 Y- Cylc2+-_4	0.534748		dbKO_5	0.560188
WT_0	Circularity	Raw_value	0.543469	Cylc1 KO_1	0.547805		Cylc2 +-_2	0.538549		Cylc2 KO_3	0.587874		Cylc1 Y- Cylc2+-_4	0.534824		dbKO_5	0.560241
WT_0	Circularity	Raw_value	0.543595	Cylc1 KO_1	0.54907		Cylc2 +-_2	0.540356		Cylc2 KO_3	0.590046		Cylc1 Y- Cylc2+-_4	0.535013		dbKO_5	0.560258
WT_0	Circularity	Raw_value	0.544648	Cylc1 KO_1	0.549081		Cylc2 +-_2	0.540621		Cylc2 KO_3	0.590791		Cylc1 Y- Cylc2+-_4	0.536435		dbKO_5	0.56197
WT_0	Circularity	Raw_value	0.544657	Cylc1 KO_1	0.549137		Cylc2 +-_2	0.541275		Cylc2 KO_3	0.592339		Cylc1 Y- Cylc2+-_4	0.536631		dbKO_5	0.5622
WT_0	Circularity	Raw_value	0.545016	Cylc1 KO_1	0.549907		Cylc2 +-_2	0.541353		Cylc2 KO_3	0.59278		Cylc1 Y- Cylc2+-_4	0.537257		dbKO_5	0.56289
WT_0	Circularity	Raw_value	0.546146	Cylc1 KO_1	0.550094		Cylc2 +-_2	0.542014		Cylc2 KO_3	0.593297		Cylc1 Y- Cylc2+-_4	0.537641		dbKO_5	0.563533
WT_0	Circularity	Raw_value	0.546297	Cylc1 KO_1	0.551125		Cylc2 +-_2	0.542212		Cylc2 KO_3	0.593886		Cylc1 Y- Cylc2+-_4	0.538174		dbKO_5	0.563635
WT_0	Circularity	Raw_value	0.546391	Cylc1 KO_1	0.551526		Cylc2 +-_2	0.543886		Cylc2 KO_3	0.595174		Cylc1 Y- Cylc2+-_4	0.538519		dbKO_5	0.56371
WT_0	Circularity	Raw_value	0.546428	Cylc1 KO_1	0.551932		Cylc2 +-_2	0.544066		Cylc2 KO_3	0.595981		Cylc1 Y- Cylc2+-_4	0.538589		dbKO_5	0.564822
WT_0	Circularity	Raw_value	0.547027	Cylc1 KO_1	0.552261		Cylc2 +-_2	0.544605		Cylc2 KO_3	0.601166		Cylc1 Y- Cylc2+-_4	0.538885		dbKO_5	0.565665
WT_0	Circularity	Raw_value	0.547974	Cylc1 KO_1	0.552465		Cylc2 +-_2	0.544675		Cylc2 KO_3	0.602946		Cylc1 Y- Cylc2+-_4	0.539792		dbKO_5	0.566415
WT_0	Circularity	Raw_value	0.549426	Cylc1 KO_1	0.552508		Cylc2 +-_2	0.545419		Cylc2 KO_3	0.603415		Cylc1 Y- Cylc2+-_4	0.539928		dbKO_5	0.567724
WT_0	Circularity	Raw_value	0.549572	Cylc1 KO_1	0.552899		Cylc2 +-_2	0.545618		Cylc2 KO_3	0.60455		Cylc1 Y- Cylc2+-_4	0.540977		dbKO_5	0.568017
WT_0	Circularity	Raw_value	0.550542	Cylc1 KO_1	0.553495		Cylc2 +-_2	0.545625		Cylc2 KO_3	0.605433		Cylc1 Y- Cylc2+-_4	0.541214		dbKO_5	0.568943
WT_0	Circularity	Raw_value	0.550665	Cylc1 KO_1	0.553738		Cylc2 +-_2	0.545812		Cylc2 KO_3	0.6055		Cylc1 Y- Cylc2+-_4	0.541432		dbKO_5	0.569472
WT_0	Circularity	Raw_value	0.550823	Cylc1 KO_1	0.554738		Cylc2 +-_2	0.546028		Cylc2 KO_3	0.606607		Cylc1 Y- Cylc2+-_4	0.541745		dbKO_5	0.569713
WT_0	Circularity	Raw_value	0.551072	Cylc1 KO_1	0.554937		Cylc2 +-_2	0.546409		Cylc2 KO_3	0.60729		Cylc1 Y- Cylc2+-_4	0.541869		dbKO_5	0.569765
WT_0	Circularity	Raw_value	0.551296	Cylc1 KO_1	0.555062		Cylc2 +-_2	0.547754		Cylc2 KO_3	0.60801		Cylc1 Y- Cylc2+-_4	0.542781		dbKO_5	0.570061
WT_0	Circularity	Raw_value	0.551414	Cylc1 KO_1	0.556777		Cylc2 +-_2	0.548007		Cylc2 KO_3	0.608156		Cylc1 Y- Cylc2+-_4	0.54393		dbKO_5	0.570309
WT_0	Circularity	Raw_value	0.551657	Cylc1 KO_1	0.557187		Cylc2 +-_2	0.548103		Cylc2 KO_3	0.608776		Cylc1 Y- Cylc2+-_4	0.544377		dbKO_5	0.570652
WT_0	Circularity	Raw_value	0.551813	Cylc1 KO_1	0.558719		Cylc2 +-_2	0.548536		Cylc2 KO_3	0.6114		Cylc1 Y- Cylc2+-_4	0.544471		dbKO_5	0.571186
WT_0	Circularity	Raw_value	0.552709	Cylc1 KO_1	0.559163		Cylc2 +-_2	0.5496		Cylc2 KO_3	0.612276		Cylc1 Y- Cylc2+-_4	0.545696		dbKO_5	0.571983
WT_0	Circularity	Raw_value	0.552918	Cylc1 KO_1	0.559384		Cylc2 +-_2	0.549655		Cylc2 KO_3	0.613757		Cylc1 Y- Cylc2+-_4	0.546379		dbKO_5	0.572059
WT_0	Circularity	Raw_value	0.55292	Cylc1 KO_1	0.559576		Cylc2 +-_2	0.549673		Cylc2 KO_3	0.61441		Cylc1 Y- Cylc2+-_4	0.546815		dbKO_5	0.572521
WT_0	Circularity	Raw_value	0.55337	Cylc1 KO_1	0.559701		Cylc2 +-_2	0.550382		Cylc2 KO_3	0.614879		Cylc1 Y- Cylc2+-_4	0.547798		dbKO_5	0.57278
WT_0	Circularity	Raw_value	0.553547	Cylc1 KO_1	0.559702		Cylc2 +-_2	0.550616		Cylc2 KO_3	0.615206		Cylc1 Y- Cylc2+-_4	0.54783		dbKO_5	0.573757
WT_0	Circularity	Raw_value	0.554022	Cylc1 KO_1	0.559988		Cylc2 +-_2	0.550673		Cylc2 KO_3	0.616646		Cylc1 Y- Cylc2+-_4	0.547992		dbKO_5	0.574036
WT_0	Circularity	Raw_value	0.556055	Cylc1 KO_1	0.56045		Cylc2 +-_2	0.550841		Cylc2 KO_3	0.617463		Cylc1 Y- Cylc2+-_4	0.548291		dbKO_5	0.574306
WT_0	Circularity	Raw_value	0.556391	Cylc1 KO_1	0.560551		Cylc2 +-_2	0.551755		Cylc2 KO_3	0.61896		Cylc1 Y- Cylc2+-_4	0.549563		dbKO_5	0.57449
WT_0	Circularity	Raw_value	0.556641	Cylc1 KO_1	0.56087		Cylc2 +-_2	0.55188		Cylc2 KO_3	0.620586		Cylc1 Y- Cylc2+-_4	0.549905		dbKO_5	0.575146
WT_0	Circularity	Raw_value	0.556688	Cylc1 KO_1	0.561015		Cylc2 +-_2	0.552003		Cylc2 KO_3	0.623235		Cylc1 Y- Cylc2+-_4	0.550808		dbKO_5	0.575857
WT_0	Circularity	Raw_value	0.556908	Cylc1 KO_1	0.562179		Cylc2 +-_2	0.552615		Cylc2 KO_3	0.623527		Cylc1 Y- Cylc2+-_4	0.551034		dbKO_5	0.575943
WT_0	Circularity	Raw_value	0.55724	Cylc1 KO_1	0.562219		Cylc2 +-_2	0.552747		Cylc2 KO_3	0.625398		Cylc1 Y- Cylc2+-_4	0.551551		dbKO_5	0.577029
WT_0	Circularity	Raw_value	0.558309	Cylc1 KO_1	0.562729		Cylc2 +-_2	0.553954		Cylc2 KO_3	0.625791		Cylc1 Y- Cylc2+-_4	0.551734		dbKO_5	0.577392
WT_0	Circularity	Raw_value	0.5586	Cylc1 KO_1	0.5629		Cylc2 +-_2	0.555244		Cylc2 KO_3	0.627821		Cylc1 Y- Cylc2+-_4	0.552773		dbKO_5	0.578064
WT_0	Circularity	Raw_value	0.55897	Cylc1 KO_1	0.56335		Cylc2 +-_2	0.555325		Cylc2 KO_3	0.628724		Cylc1 Y- Cylc2+-_4	0.552963		dbKO_5	0.578163
WT_0	Circularity	Raw_value	0.559042	Cylc1 KO_1	0.563735		Cylc2 +-_2	0.555678		Cylc2 KO_3	0.63239		Cylc1 Y- Cylc2+-_4	0.553096		dbKO_5	0.578371
WT_0	Circularity	Raw_value	0.561862	Cylc1 KO_1	0.564551		Cylc2 +-_2	0.555812		Cylc2 KO_3	0.633222		Cylc1 Y- Cylc2+-_4	0.553596		dbKO_5	0.578451
WT_0	Circularity	Raw_value	0.562951	Cylc1 KO_1	0.565047		Cylc2 +-_2	0.556066		Cylc2 KO_3	0.635308		Cylc1 Y- Cylc2+-_4	0.554191		dbKO_5	0.580713
WT_0	Circularity	Raw_value	0.563168	Cylc1 KO_1	0.565206		Cylc2 +-_2	0.556604		Cylc2 KO_3	0.636905		Cylc1 Y- Cylc2+-_4	0.554578		dbKO_5	0.581008
WT_0	Circularity	Raw_value	0.563546	Cylc1 KO_1	0.565585		Cylc2 +-_2	0.556613		Cylc2 KO_3	0.63695		Cylc1 Y- Cylc2+-_4	0.555049		dbKO_5	0.581066
WT_0	Circularity	Raw_value	0.563625	Cylc1 KO_1	0.565726		Cylc2 +-_2	0.556641		Cylc2 KO_3	0.636986		Cylc1 Y- Cylc2+-_4	0.556146		dbKO_5	0.583042
WT_0	Circularity	Raw_value	0.563636	Cylc1 KO_1	0.565849		Cylc2 +-_2	0.556654		Cylc2 KO_3	0.637775		Cylc1 Y- Cylc2+-_4	0.556417		dbKO_5	0.583251
WT_0	Circularity	Raw_value	0.564391	Cylc1 KO_1	0.565953		Cylc2 +-_2	0.557823		Cylc2 KO_3	0.637876		Cylc1 Y- Cylc2+-_4	0.556524		dbKO_5	0.584652
WT_0	Circularity	Raw_value	0.564575	Cylc1 KO_1	0.566168		Cylc2 +-_2	0.558372		Cylc2 KO_3	0.638278		Cylc1 Y- Cylc2+-_4	0.556562		dbKO_5	0.585446
WT_0	Circularity	Raw_value	0.564635	Cylc1 KO_1	0.566199		Cylc2 +-_2	0.558606		Cylc2 KO_3	0.638843		Cylc1 Y- Cylc2+-_4	0.557412		dbKO_5	0.586327
WT_0	Circularity	Raw_value	0.56469	Cylc1 KO_1	0.56624		Cylc2 +-_2	0.558859		Cylc2 KO_3	0.639653		Cylc1 Y- Cylc2+-_4	0.557818		dbKO_5	0.586455
WT_0	Circularity	Raw_value	0.564845	Cylc1 KO_1	0.566369		Cylc2 +-_2	0.560889		Cylc2 KO_3	0.640663		Cylc1 Y- Cylc2+-_4	0.558597		dbKO_5	0.587411
WT_0	Circularity	Raw_value	0.565318	Cylc1 KO_1	0.56638		Cylc2 +-_2	0.561469		Cylc2 KO_3	0.641214		Cylc1 Y- Cylc2+-_4	0.559604		dbKO_5	0.5897
WT_0	Circularity	Raw_value	0.565606	Cylc1 KO_1	0.566601		Cylc2 +-_2	0.561529		Cylc2 KO_3	0.641502		Cylc1 Y- Cylc2+-_4	0.559662		dbKO_5	0.59182
WT_0	Circularity	Raw_value	0.566846	Cylc1 KO_1	0.566651		Cylc2 +-_2	0.561909		Cylc2 KO_3	0.641723		Cylc1 Y- Cylc2+-_4	0.559955		dbKO_5	0.591869
WT_0	Circularity	Raw_value	0.567611	Cylc1 KO_1	0.566824		Cylc2 +-_2	0.562559		Cylc2 KO_3	0.644496		Cylc1 Y- Cylc2+-_4	0.560515		dbKO_5	0.592278
WT_0	Circularity	Raw_value	0.567769	Cylc1 KO_1	0.566923		Cylc2 +-_2	0.562868		Cylc2 KO_3	0.645143		Cylc1 Y- Cylc2+-_4	0.560905		dbKO_5	0.592826
WT_0	Circularity	Raw_value	0.568358	Cylc1 KO_1	0.567155		Cylc2 +-_2	0.563744		Cylc2 KO_3	0.645757		Cylc1 Y- Cylc2+-_4	0.561251		dbKO_5	0.593866
WT_0	Circularity	Raw_value	0.568367	Cylc1 KO_1	0.567224		Cylc2 +-_2	0.564083		Cylc2 KO_3	0.649752		Cylc1 Y- Cylc2+-_4	0.562334		dbKO_5	0.594937
WT_0	Circularity	Raw_value	0.568805	Cylc1 KO_1	0.568096		Cylc2 +-_2	0.564339		Cylc2 KO_3	0.6498		Cylc1 Y- Cylc2+-_4	0.562378		dbKO_5	0.594978
WT_0	Circularity	Raw_value	0.568882	Cylc1 KO_1	0.56904		Cylc2 +-_2	0.564414		Cylc2 KO_3	0.651252		Cylc1 Y- Cylc2+-_4	0.563196		dbKO_5	0.595561
WT_0	Circularity	Raw_value	0.568973	Cylc1 KO_1	0.569266		Cylc2 +-_2	0.565008		Cylc2 KO_3	0.652704		Cylc1 Y- Cylc2+-_4	0.563235		dbKO_5	0.595995
WT_0	Circularity	Raw_value	0.569088	Cylc1 KO_1	0.569269		Cylc2 +-_2	0.565095		Cylc2 KO_3	0.655936		Cylc1 Y- Cylc2+-_4	0.563683		dbKO_5	0.597588
WT_0	Circularity	Raw_value	0.570264	Cylc1 KO_1	0.569301		Cylc2 +-_2	0.565791		Cylc2 KO_3	0.656821		Cylc1 Y- Cylc2+-_4	0.564087		dbKO_5	0.597613
WT_0	Circularity	Raw_value	0.570298	Cylc1 KO_1	0.569535		Cylc2 +-_2	0.566039		Cylc2 KO_3	0.658681		Cylc1 Y- Cylc2+-_4	0.564846		dbKO_5	0.597913
WT_0	Circularity	Raw_value	0.570363	Cylc1 KO_1	0.570026		Cylc2 +-_2	0.566125		Cylc2 KO_3	0.659662		Cylc1 Y- Cylc2+-_4	0.565665		dbKO_5	0.598156
WT_0	Circularity	Raw_value	0.5704	Cylc1 KO_1	0.57037		Cylc2 +-_2	0.566277		Cylc2 KO_3	0.661018		Cylc1 Y- Cylc2+-_4	0.566315		dbKO_5	0.598285
WT_0	Circularity	Raw_value	0.570456	Cylc1 KO_1	0.570953		Cylc2 +-_2	0.567523		Cylc2 KO_3	0.661053		Cylc1 Y- Cylc2+-_4	0.566864		dbKO_5	0.599198
WT_0	Circularity	Raw_value	0.571019	Cylc1 KO_1	0.571204		Cylc2 +-_2	0.567983		Cylc2 KO_3	0.661615		Cylc1 Y- Cylc2+-_4	0.567055		dbKO_5	0.599264
WT_0	Circularity	Raw_value	0.571099	Cylc1 KO_1	0.571309		Cylc2 +-_2	0.568268		Cylc2 KO_3	0.662225		Cylc1 Y- Cylc2+-_4	0.56811		dbKO_5	0.599483
WT_0	Circularity	Raw_value	0.571554	Cylc1 KO_1	0.57211		Cylc2 +-_2	0.568711		Cylc2 KO_3	0.666009		Cylc1 Y- Cylc2+-_4	0.56846		dbKO_5	0.599671
WT_0	Circularity	Raw_value	0.572723	Cylc1 KO_1	0.573091		Cylc2 +-_2	0.569422		Cylc2 KO_3	0.669737		Cylc1 Y- Cylc2+-_4	0.56946		dbKO_5	0.599822
WT_0	Circularity	Raw_value	0.573003	Cylc1 KO_1	0.573376		Cylc2 +-_2	0.569443		Cylc2 KO_3	0.670818		Cylc1 Y- Cylc2+-_4	0.569471		dbKO_5	0.60121
WT_0	Circularity	Raw_value	0.573338	Cylc1 KO_1	0.573572		Cylc2 +-_2	0.569477		Cylc2 KO_3	0.670938		Cylc1 Y- Cylc2+-_4	0.57028		dbKO_5	0.601485
WT_0	Circularity	Raw_value	0.573503	Cylc1 KO_1	0.574167		Cylc2 +-_2	0.569529		Cylc2 KO_3	0.673304		Cylc1 Y- Cylc2+-_4	0.571658		dbKO_5	0.602334
WT_0	Circularity	Raw_value	0.574138	Cylc1 KO_1	0.574374		Cylc2 +-_2	0.569944		Cylc2 KO_3	0.68443		Cylc1 Y- Cylc2+-_4	0.571911		dbKO_5	0.602531
WT_0	Circularity	Raw_value	0.574957	Cylc1 KO_1	0.574717		Cylc2 +-_2	0.57003		Cylc2 KO_3	0.685893		Cylc1 Y- Cylc2+-_4	0.572082		dbKO_5	0.602915
WT_0	Circularity	Raw_value	0.575218	Cylc1 KO_1	0.575176		Cylc2 +-_2	0.570208		Cylc2 KO_3	0.689005		Cylc1 Y- Cylc2+-_4	0.572528		dbKO_5	0.604123
WT_0	Circularity	Raw_value	0.576071	Cylc1 KO_1	0.575259		Cylc2 +-_2	0.570277		Cylc2 KO_3	0.690548		Cylc1 Y- Cylc2+-_4	0.572606		dbKO_5	0.60507
WT_0	Circularity	Raw_value	0.576272	Cylc1 KO_1	0.575423		Cylc2 +-_2	0.570359		Cylc2 KO_3	0.69613		Cylc1 Y- Cylc2+-_4	0.57313		dbKO_5	0.605177
WT_0	Circularity	Raw_value	0.576381	Cylc1 KO_1	0.576241		Cylc2 +-_2	0.570747		Cylc2 KO_3	0.696695		Cylc1 Y- Cylc2+-_4	0.573178		dbKO_5	0.60707
WT_0	Circularity	Raw_value	0.576834	Cylc1 KO_1	0.576487		Cylc2 +-_2	0.571174		Cylc2 KO_3	0.696827		Cylc1 Y- Cylc2+-_4	0.574361		dbKO_5	0.60812
WT_0	Circularity	Raw_value	0.577318	Cylc1 KO_1	0.577877		Cylc2 +-_2	0.571453		Cylc2 KO_3	0.698008		Cylc1 Y- Cylc2+-_4	0.575162		dbKO_5	0.608847
WT_0	Circularity	Raw_value	0.577448	Cylc1 KO_1	0.578717		Cylc2 +-_2	0.571615		Cylc2 KO_3	0.699838		Cylc1 Y- Cylc2+-_4	0.575499		dbKO_5	0.608952
WT_0	Circularity	Raw_value	0.57768	Cylc1 KO_1	0.579349		Cylc2 +-_2	0.572085		Cylc2 KO_3	0.700371		Cylc1 Y- Cylc2+-_4	0.575818		dbKO_5	0.609249
WT_0	Circularity	Raw_value	0.578699	Cylc1 KO_1	0.579368		Cylc2 +-_2	0.572543		Cylc2 KO_3	0.700973		Cylc1 Y- Cylc2+-_4	0.575964		dbKO_5	0.609384
WT_0	Circularity	Raw_value	0.579463	Cylc1 KO_1	0.579375		Cylc2 +-_2	0.572633		Cylc2 KO_3	0.70817		Cylc1 Y- Cylc2+-_4	0.57599		dbKO_5	0.609816
WT_0	Circularity	Raw_value	0.579949	Cylc1 KO_1	0.579461		Cylc2 +-_2	0.573139		Cylc2 KO_3	0.70876		Cylc1 Y- Cylc2+-_4	0.576217		dbKO_5	0.610113
WT_0	Circularity	Raw_value	0.580288	Cylc1 KO_1	0.579798		Cylc2 +-_2	0.573517		Cylc2 KO_3	0.709482		Cylc1 Y- Cylc2+-_4	0.576807		dbKO_5	0.610281
WT_0	Circularity	Raw_value	0.580519	Cylc1 KO_1	0.580184		Cylc2 +-_2	0.574857		Cylc2 KO_3	0.716611		Cylc1 Y- Cylc2+-_4	0.577887		dbKO_5	0.610744
WT_0	Circularity	Raw_value	0.58052	Cylc1 KO_1	0.581151		Cylc2 +-_2	0.574944		Cylc2 KO_3	0.718507		Cylc1 Y- Cylc2+-_4	0.578139		dbKO_5	0.613524
WT_0	Circularity	Raw_value	0.580887	Cylc1 KO_1	0.581201		Cylc2 +-_2	0.575799		Cylc2 KO_3	0.729566		Cylc1 Y- Cylc2+-_4	0.578197		dbKO_5	0.614234
WT_0	Circularity	Raw_value	0.580938	Cylc1 KO_1	0.581364		Cylc2 +-_2	0.576493		Cylc2 KO_3	0.730443		Cylc1 Y- Cylc2+-_4	0.579219		dbKO_5	0.614303
WT_0	Circularity	Raw_value	0.581445	Cylc1 KO_1	0.581635		Cylc2 +-_2	0.576505		Cylc2 KO_3	0.736692		Cylc1 Y- Cylc2+-_4	0.579233		dbKO_5	0.615091
WT_0	Circularity	Raw_value	0.581668	Cylc1 KO_1	0.581806		Cylc2 +-_2	0.57765		Cylc2 KO_3	0.73699		Cylc1 Y- Cylc2+-_4	0.579271		dbKO_5	0.615343
WT_0	Circularity	Raw_value	0.582223	Cylc1 KO_1	0.582421		Cylc2 +-_2	0.579103		Cylc2 KO_3	0.74831		Cylc1 Y- Cylc2+-_4	0.579926		dbKO_5	0.615395
WT_0	Circularity	Raw_value	0.58305	Cylc1 KO_1	0.583472		Cylc2 +-_2	0.579227		Cylc2 KO_3	0.755631		Cylc1 Y- Cylc2+-_4	0.580028		dbKO_5	0.615702
WT_0	Circularity	Raw_value	0.5832	Cylc1 KO_1	0.583754		Cylc2 +-_2	0.580629		Cylc2 KO_3	0.761669		Cylc1 Y- Cylc2+-_4	0.580035		dbKO_5	0.616321
WT_0	Circularity	Raw_value	0.583912	Cylc1 KO_1	0.584015		Cylc2 +-_2	0.581031		Cylc2 KO_3	0.774813		Cylc1 Y- Cylc2+-_4	0.580134		dbKO_5	0.617414
WT_0	Circularity	Raw_value	0.584874	Cylc1 KO_1	0.584154		Cylc2 +-_2	0.58105		Cylc2 KO_3	0.775841		Cylc1 Y- Cylc2+-_4	0.580729		dbKO_5	0.617471
WT_0	Circularity	Raw_value	0.585671	Cylc1 KO_1	0.584362		Cylc2 +-_2	0.581226		Cylc2 KO_3	0.775999		Cylc1 Y- Cylc2+-_4	0.580933		dbKO_5	0.618859
WT_0	Circularity	Raw_value	0.586111	Cylc1 KO_1	0.585295		Cylc2 +-_2	0.582884		Cylc2 KO_3	0.777229		Cylc1 Y- Cylc2+-_4	0.581865		dbKO_5	0.62426
WT_0	Circularity	Raw_value	0.586354	Cylc1 KO_1	0.585581		Cylc2 +-_2	0.583238		Cylc2 KO_3	0.782042		Cylc1 Y- Cylc2+-_4	0.582384		dbKO_5	0.628894
WT_0	Circularity	Raw_value	0.586804	Cylc1 KO_1	0.586161		Cylc2 +-_2	0.584225		Cylc2 KO_3	0.782575		Cylc1 Y- Cylc2+-_4	0.582742		dbKO_5	0.629302
WT_0	Circularity	Raw_value	0.58721	Cylc1 KO_1	0.586386		Cylc2 +-_2	0.584926		Cylc2 KO_3	0.791469		Cylc1 Y- Cylc2+-_4	0.58383		dbKO_5	0.630233
WT_0	Circularity	Raw_value	0.589761	Cylc1 KO_1	0.58676		Cylc2 +-_2	0.585555		Cylc2 KO_3	0.794709		Cylc1 Y- Cylc2+-_4	0.584262		dbKO_5	0.631122
WT_0	Circularity	Raw_value	0.59058	Cylc1 KO_1	0.588381		Cylc2 +-_2	0.585916					Cylc1 Y- Cylc2+-_4	0.584264		dbKO_5	0.631211
WT_0	Circularity	Raw_value	0.590749	Cylc1 KO_1	0.588622		Cylc2 +-_2	0.58605					Cylc1 Y- Cylc2+-_4	0.584304		dbKO_5	0.63378
WT_0	Circularity	Raw_value	0.59228	Cylc1 KO_1	0.589039		Cylc2 +-_2	0.586538					Cylc1 Y- Cylc2+-_4	0.584677		dbKO_5	0.634976
WT_0	Circularity	Raw_value	0.592357	Cylc1 KO_1	0.589664		Cylc2 +-_2	0.58791					Cylc1 Y- Cylc2+-_4	0.585141		dbKO_5	0.63552
WT_0	Circularity	Raw_value	0.592858	Cylc1 KO_1	0.589767		Cylc2 +-_2	0.588678					Cylc1 Y- Cylc2+-_4	0.585341		dbKO_5	0.636848
WT_0	Circularity	Raw_value	0.593075	Cylc1 KO_1	0.589962		Cylc2 +-_2	0.589508					Cylc1 Y- Cylc2+-_4	0.585982		dbKO_5	0.637135
WT_0	Circularity	Raw_value	0.593145	Cylc1 KO_1	0.59039		Cylc2 +-_2	0.589525					Cylc1 Y- Cylc2+-_4	0.586296		dbKO_5	0.639
WT_0	Circularity	Raw_value	0.594105	Cylc1 KO_1	0.590672		Cylc2 +-_2	0.590125					Cylc1 Y- Cylc2+-_4	0.586796		dbKO_5	0.640295
WT_0	Circularity	Raw_value	0.596802	Cylc1 KO_1	0.591603		Cylc2 +-_2	0.590387					Cylc1 Y- Cylc2+-_4	0.586935		dbKO_5	0.640683
WT_0	Circularity	Raw_value	0.597161	Cylc1 KO_1	0.592174		Cylc2 +-_2	0.590434					Cylc1 Y- Cylc2+-_4	0.587648		dbKO_5	0.642243
WT_0	Circularity	Raw_value	0.599244	Cylc1 KO_1	0.592556		Cylc2 +-_2	0.591358					Cylc1 Y- Cylc2+-_4	0.58776		dbKO_5	0.642249
WT_0	Circularity	Raw_value	0.600631	Cylc1 KO_1	0.593198		Cylc2 +-_2	0.592135					Cylc1 Y- Cylc2+-_4	0.587907		dbKO_5	0.642361
WT_0	Circularity	Raw_value	0.601902	Cylc1 KO_1	0.594603		Cylc2 +-_2	0.59344					Cylc1 Y- Cylc2+-_4	0.588264		dbKO_5	0.642505
WT_0	Circularity	Raw_value	0.602346	Cylc1 KO_1	0.595541		Cylc2 +-_2	0.593522					Cylc1 Y- Cylc2+-_4	0.588536		dbKO_5	0.646362
WT_0	Circularity	Raw_value	0.603217	Cylc1 KO_1	0.59628		Cylc2 +-_2	0.593673					Cylc1 Y- Cylc2+-_4	0.589126		dbKO_5	0.647983
WT_0	Circularity	Raw_value	0.603714	Cylc1 KO_1	0.596347		Cylc2 +-_2	0.593766					Cylc1 Y- Cylc2+-_4	0.589264		dbKO_5	0.649188
WT_0	Circularity	Raw_value	0.604867	Cylc1 KO_1	0.597398		Cylc2 +-_2	0.595254					Cylc1 Y- Cylc2+-_4	0.589482		dbKO_5	0.650426
WT_0	Circularity	Raw_value	0.607196	Cylc1 KO_1	0.597875		Cylc2 +-_2	0.596278					Cylc1 Y- Cylc2+-_4	0.589943		dbKO_5	0.651674
WT_0	Circularity	Raw_value	0.607939	Cylc1 KO_1	0.598225		Cylc2 +-_2	0.596474					Cylc1 Y- Cylc2+-_4	0.590025		dbKO_5	0.653315
WT_0	Circularity	Raw_value	0.609098	Cylc1 KO_1	0.598364		Cylc2 +-_2	0.597183					Cylc1 Y- Cylc2+-_4	0.590219		dbKO_5	0.654429
WT_0	Circularity	Raw_value	0.609317	Cylc1 KO_1	0.598441		Cylc2 +-_2	0.598174					Cylc1 Y- Cylc2+-_4	0.590232		dbKO_5	0.657503
WT_0	Circularity	Raw_value	0.610355	Cylc1 KO_1	0.598473		Cylc2 +-_2	0.598496					Cylc1 Y- Cylc2+-_4	0.59043		dbKO_5	0.659301
WT_0	Circularity	Raw_value	0.610748	Cylc1 KO_1	0.59913		Cylc2 +-_2	0.599964					Cylc1 Y- Cylc2+-_4	0.590517		dbKO_5	0.66068
WT_0	Circularity	Raw_value	0.611933	Cylc1 KO_1	0.599443		Cylc2 +-_2	0.599989					Cylc1 Y- Cylc2+-_4	0.591674		dbKO_5	0.662202
WT_0	Circularity	Raw_value	0.6132	Cylc1 KO_1	0.599588		Cylc2 +-_2	0.600417					Cylc1 Y- Cylc2+-_4	0.591836		dbKO_5	0.663318
WT_0	Circularity	Raw_value	0.61352	Cylc1 KO_1	0.599624		Cylc2 +-_2	0.601262					Cylc1 Y- Cylc2+-_4	0.592098		dbKO_5	0.663563
WT_0	Circularity	Raw_value	0.613664	Cylc1 KO_1	0.600145		Cylc2 +-_2	0.602354					Cylc1 Y- Cylc2+-_4	0.592108		dbKO_5	0.665194
WT_0	Circularity	Raw_value	0.617661	Cylc1 KO_1	0.60256		Cylc2 +-_2	0.603541					Cylc1 Y- Cylc2+-_4	0.592252		dbKO_5	0.667785
WT_0	Circularity	Raw_value	0.619868	Cylc1 KO_1	0.602846		Cylc2 +-_2	0.603913					Cylc1 Y- Cylc2+-_4	0.59248		dbKO_5	0.671029
WT_0	Circularity	Raw_value	0.620375	Cylc1 KO_1	0.603527		Cylc2 +-_2	0.604494					Cylc1 Y- Cylc2+-_4	0.592529		dbKO_5	0.675612
WT_0	Circularity	Raw_value	0.621136	Cylc1 KO_1	0.604143		Cylc2 +-_2	0.609319					Cylc1 Y- Cylc2+-_4	0.592784		dbKO_5	0.679337
WT_0	Circularity	Raw_value	0.622464	Cylc1 KO_1	0.604416		Cylc2 +-_2	0.610319					Cylc1 Y- Cylc2+-_4	0.593068		dbKO_5	0.681459
WT_0	Circularity	Raw_value	0.624549	Cylc1 KO_1	0.605141		Cylc2 +-_2	0.610624					Cylc1 Y- Cylc2+-_4	0.593196		dbKO_5	0.682824
WT_0	Circularity	Raw_value	0.624739	Cylc1 KO_1	0.60558		Cylc2 +-_2	0.611084					Cylc1 Y- Cylc2+-_4	0.593698		dbKO_5	0.684355
WT_0	Circularity	Raw_value	0.624829	Cylc1 KO_1	0.605673		Cylc2 +-_2	0.611598					Cylc1 Y- Cylc2+-_4	0.593889		dbKO_5	0.685939
WT_0	Circularity	Raw_value	0.62656	Cylc1 KO_1	0.606354		Cylc2 +-_2	0.613339					Cylc1 Y- Cylc2+-_4	0.594065		dbKO_5	0.687089
WT_0	Circularity	Raw_value	0.626872	Cylc1 KO_1	0.606987		Cylc2 +-_2	0.61469					Cylc1 Y- Cylc2+-_4	0.594118		dbKO_5	0.689904
WT_0	Circularity	Raw_value	0.629192	Cylc1 KO_1	0.607824		Cylc2 +-_2	0.614867					Cylc1 Y- Cylc2+-_4	0.594319		dbKO_5	0.690139
WT_0	Circularity	Raw_value	0.631745	Cylc1 KO_1	0.607882		Cylc2 +-_2	0.614962					Cylc1 Y- Cylc2+-_4	0.594404		dbKO_5	0.690414
WT_0	Circularity	Raw_value	0.632229	Cylc1 KO_1	0.60847		Cylc2 +-_2	0.615246					Cylc1 Y- Cylc2+-_4	0.595561		dbKO_5	0.691481
WT_0	Circularity	Raw_value	0.635072	Cylc1 KO_1	0.608968		Cylc2 +-_2	0.615719					Cylc1 Y- Cylc2+-_4	0.5958		dbKO_5	0.693101
WT_0	Circularity	Raw_value	0.636034	Cylc1 KO_1	0.60912		Cylc2 +-_2	0.616775					Cylc1 Y- Cylc2+-_4	0.59617		dbKO_5	0.693439
WT_0	Circularity	Raw_value	0.638337	Cylc1 KO_1	0.609279		Cylc2 +-_2	0.61772					Cylc1 Y- Cylc2+-_4	0.597084		dbKO_5	0.694702
WT_0	Circularity	Raw_value	0.640293	Cylc1 KO_1	0.6093		Cylc2 +-_2	0.618384					Cylc1 Y- Cylc2+-_4	0.598064		dbKO_5	0.697883
WT_0	Circularity	Raw_value	0.642857	Cylc1 KO_1	0.609816		Cylc2 +-_2	0.618791					Cylc1 Y- Cylc2+-_4	0.5981		dbKO_5	0.69987
WT_0	Circularity	Raw_value	0.646722	Cylc1 KO_1	0.612217		Cylc2 +-_2	0.619501					Cylc1 Y- Cylc2+-_4	0.598192		dbKO_5	0.701013
WT_0	Circularity	Raw_value	0.647302	Cylc1 KO_1	0.61423		Cylc2 +-_2	0.621134					Cylc1 Y- Cylc2+-_4	0.598568		dbKO_5	0.702579
WT_0	Circularity	Raw_value	0.650502	Cylc1 KO_1	0.614526		Cylc2 +-_2	0.622234					Cylc1 Y- Cylc2+-_4	0.599484		dbKO_5	0.703533
WT_0	Circularity	Raw_value	0.652602	Cylc1 KO_1	0.61463		Cylc2 +-_2	0.623					Cylc1 Y- Cylc2+-_4	0.59981		dbKO_5	0.705713
WT_0	Circularity	Raw_value	0.653325	Cylc1 KO_1	0.61492		Cylc2 +-_2	0.624489					Cylc1 Y- Cylc2+-_4	0.599918		dbKO_5	0.706919
WT_0	Circularity	Raw_value	0.653331	Cylc1 KO_1	0.615365		Cylc2 +-_2	0.62469					Cylc1 Y- Cylc2+-_4	0.60127		dbKO_5	0.714648
WT_0	Circularity	Raw_value	0.654022	Cylc1 KO_1	0.618123		Cylc2 +-_2	0.630879					Cylc1 Y- Cylc2+-_4	0.60163		dbKO_5	0.719197
WT_0	Circularity	Raw_value	0.655287	Cylc1 KO_1	0.618139		Cylc2 +-_2	0.631154					Cylc1 Y- Cylc2+-_4	0.602192		dbKO_5	0.719749
WT_0	Circularity	Raw_value	0.655545	Cylc1 KO_1	0.619184		Cylc2 +-_2	0.632303					Cylc1 Y- Cylc2+-_4	0.603606		dbKO_5	0.722627
WT_0	Circularity	Raw_value	0.656345	Cylc1 KO_1	0.61953		Cylc2 +-_2	0.632591					Cylc1 Y- Cylc2+-_4	0.604063		dbKO_5	0.72535
WT_0	Circularity	Raw_value	0.656467	Cylc1 KO_1	0.619744		Cylc2 +-_2	0.635034					Cylc1 Y- Cylc2+-_4	0.604462		dbKO_5	0.725443
WT_0	Circularity	Raw_value	0.656628	Cylc1 KO_1	0.619925		Cylc2 +-_2	0.63529					Cylc1 Y- Cylc2+-_4	0.605973		dbKO_5	0.726197
WT_0	Circularity	Raw_value	0.658269	Cylc1 KO_1	0.621351		Cylc2 +-_2	0.635709					Cylc1 Y- Cylc2+-_4	0.605991		dbKO_5	0.726974
WT_0	Circularity	Raw_value	0.659613	Cylc1 KO_1	0.62162		Cylc2 +-_2	0.635794					Cylc1 Y- Cylc2+-_4	0.607688		dbKO_5	0.73817
WT_0	Circularity	Raw_value	0.660486	Cylc1 KO_1	0.621736		Cylc2 +-_2	0.637707					Cylc1 Y- Cylc2+-_4	0.608141		dbKO_5	0.739837
WT_0	Circularity	Raw_value	0.663639	Cylc1 KO_1	0.622241		Cylc2 +-_2	0.637922					Cylc1 Y- Cylc2+-_4	0.608211		dbKO_5	0.741831
WT_0	Circularity	Raw_value	0.666269	Cylc1 KO_1	0.623214		Cylc2 +-_2	0.639223					Cylc1 Y- Cylc2+-_4	0.608401		dbKO_5	0.746764
WT_0	Circularity	Raw_value	0.667329	Cylc1 KO_1	0.623723		Cylc2 +-_2	0.641526					Cylc1 Y- Cylc2+-_4	0.610273		dbKO_5	0.754853
WT_0	Circularity	Raw_value	0.668284	Cylc1 KO_1	0.624551		Cylc2 +-_2	0.642669					Cylc1 Y- Cylc2+-_4	0.610407		dbKO_5	0.759142
WT_0	Circularity	Raw_value	0.67013	Cylc1 KO_1	0.624628		Cylc2 +-_2	0.64364					Cylc1 Y- Cylc2+-_4	0.610996		dbKO_5	0.761844
WT_0	Circularity	Raw_value	0.672562	Cylc1 KO_1	0.625052		Cylc2 +-_2	0.643702					Cylc1 Y- Cylc2+-_4	0.61117		dbKO_5	0.761995
WT_0	Circularity	Raw_value	0.674367	Cylc1 KO_1	0.625145		Cylc2 +-_2	0.6444					Cylc1 Y- Cylc2+-_4	0.613928		dbKO_5	0.762585
WT_0	Circularity	Raw_value	0.681917	Cylc1 KO_1	0.625846		Cylc2 +-_2	0.645061					Cylc1 Y- Cylc2+-_4	0.614664		dbKO_5	0.768819
WT_0	Circularity	Raw_value	0.68266	Cylc1 KO_1	0.626028		Cylc2 +-_2	0.647624					Cylc1 Y- Cylc2+-_4	0.615474		dbKO_5	0.78051
WT_0	Circularity	Raw_value	0.68989	Cylc1 KO_1	0.626358		Cylc2 +-_2	0.648301					Cylc1 Y- Cylc2+-_4	0.615623
WT_0	Circularity	Raw_value	0.705005	Cylc1 KO_1	0.627169		Cylc2 +-_2	0.649987					Cylc1 Y- Cylc2+-_4	0.615832
WT_0	Circularity	Raw_value	0.70528	Cylc1 KO_1	0.629276		Cylc2 +-_2	0.650865					Cylc1 Y- Cylc2+-_4	0.616572
WT_0	Circularity	Raw_value	0.706138	Cylc1 KO_1	0.629836		Cylc2 +-_2	0.651014					Cylc1 Y- Cylc2+-_4	0.616973
WT_0	Circularity	Raw_value	0.713793	Cylc1 KO_1	0.630403		Cylc2 +-_2	0.651786					Cylc1 Y- Cylc2+-_4	0.618816
WT_0	Circularity	Raw_value	0.771611	Cylc1 KO_1	0.630628		Cylc2 +-_2	0.652297					Cylc1 Y- Cylc2+-_4	0.618849
				Cylc1 KO_1	0.63097		Cylc2 +-_2	0.653149					Cylc1 Y- Cylc2+-_4	0.623326
				Cylc1 KO_1	0.632054		Cylc2 +-_2	0.653243					Cylc1 Y- Cylc2+-_4	0.624634
				Cylc1 KO_1	0.632743		Cylc2 +-_2	0.655445					Cylc1 Y- Cylc2+-_4	0.624769
				Cylc1 KO_1	0.633689		Cylc2 +-_2	0.657008					Cylc1 Y- Cylc2+-_4	0.626092
				Cylc1 KO_1	0.634791		Cylc2 +-_2	0.658548					Cylc1 Y- Cylc2+-_4	0.626129
				Cylc1 KO_1	0.635791		Cylc2 +-_2	0.659065					Cylc1 Y- Cylc2+-_4	0.628694
				Cylc1 KO_1	0.636599		Cylc2 +-_2	0.65968					Cylc1 Y- Cylc2+-_4	0.629394
				Cylc1 KO_1	0.637642		Cylc2 +-_2	0.659808					Cylc1 Y- Cylc2+-_4	0.630374
				Cylc1 KO_1	0.639239		Cylc2 +-_2	0.661343					Cylc1 Y- Cylc2+-_4	0.630414
				Cylc1 KO_1	0.641399		Cylc2 +-_2	0.661577					Cylc1 Y- Cylc2+-_4	0.630611
				Cylc1 KO_1	0.641844		Cylc2 +-_2	0.665021					Cylc1 Y- Cylc2+-_4	0.630886
				Cylc1 KO_1	0.642314		Cylc2 +-_2	0.665765					Cylc1 Y- Cylc2+-_4	0.63091
				Cylc1 KO_1	0.642565		Cylc2 +-_2	0.66865					Cylc1 Y- Cylc2+-_4	0.632368
				Cylc1 KO_1	0.642819		Cylc2 +-_2	0.668693					Cylc1 Y- Cylc2+-_4	0.634558
				Cylc1 KO_1	0.643641		Cylc2 +-_2	0.670923					Cylc1 Y- Cylc2+-_4	0.637489
				Cylc1 KO_1	0.643854		Cylc2 +-_2	0.671527					Cylc1 Y- Cylc2+-_4	0.637955
				Cylc1 KO_1	0.644544		Cylc2 +-_2	0.673585					Cylc1 Y- Cylc2+-_4	0.63801
				Cylc1 KO_1	0.644921		Cylc2 +-_2	0.674979					Cylc1 Y- Cylc2+-_4	0.63813
				Cylc1 KO_1	0.645837		Cylc2 +-_2	0.675149					Cylc1 Y- Cylc2+-_4	0.639223
				Cylc1 KO_1	0.64801		Cylc2 +-_2	0.675572					Cylc1 Y- Cylc2+-_4	0.640444
				Cylc1 KO_1	0.648649		Cylc2 +-_2	0.677108					Cylc1 Y- Cylc2+-_4	0.640707
				Cylc1 KO_1	0.649366		Cylc2 +-_2	0.679549					Cylc1 Y- Cylc2+-_4	0.643468
				Cylc1 KO_1	0.654894		Cylc2 +-_2	0.68182					Cylc1 Y- Cylc2+-_4	0.645092
				Cylc1 KO_1	0.656015		Cylc2 +-_2	0.682068					Cylc1 Y- Cylc2+-_4	0.64559
				Cylc1 KO_1	0.656633		Cylc2 +-_2	0.682423					Cylc1 Y- Cylc2+-_4	0.646423
				Cylc1 KO_1	0.657		Cylc2 +-_2	0.682602					Cylc1 Y- Cylc2+-_4	0.646505
				Cylc1 KO_1	0.659069		Cylc2 +-_2	0.683888					Cylc1 Y- Cylc2+-_4	0.646847
				Cylc1 KO_1	0.661535		Cylc2 +-_2	0.684286					Cylc1 Y- Cylc2+-_4	0.649188
				Cylc1 KO_1	0.661635		Cylc2 +-_2	0.686183					Cylc1 Y- Cylc2+-_4	0.649783
				Cylc1 KO_1	0.662248		Cylc2 +-_2	0.687159					Cylc1 Y- Cylc2+-_4	0.650489
				Cylc1 KO_1	0.662512		Cylc2 +-_2	0.690631					Cylc1 Y- Cylc2+-_4	0.650619
				Cylc1 KO_1	0.662693		Cylc2 +-_2	0.690661					Cylc1 Y- Cylc2+-_4	0.655523
				Cylc1 KO_1	0.664968		Cylc2 +-_2	0.693327					Cylc1 Y- Cylc2+-_4	0.65689
				Cylc1 KO_1	0.668		Cylc2 +-_2	0.697196					Cylc1 Y- Cylc2+-_4	0.65999
				Cylc1 KO_1	0.668116		Cylc2 +-_2	0.700377					Cylc1 Y- Cylc2+-_4	0.661442
				Cylc1 KO_1	0.668502		Cylc2 +-_2	0.70105					Cylc1 Y- Cylc2+-_4	0.663692
				Cylc1 KO_1	0.669371		Cylc2 +-_2	0.701098					Cylc1 Y- Cylc2+-_4	0.664545
				Cylc1 KO_1	0.669427		Cylc2 +-_2	0.701341					Cylc1 Y- Cylc2+-_4	0.664966
				Cylc1 KO_1	0.669585		Cylc2 +-_2	0.702034					Cylc1 Y- Cylc2+-_4	0.665762
				Cylc1 KO_1	0.670228		Cylc2 +-_2	0.703404					Cylc1 Y- Cylc2+-_4	0.667229
				Cylc1 KO_1	0.67205		Cylc2 +-_2	0.710172					Cylc1 Y- Cylc2+-_4	0.668742
				Cylc1 KO_1	0.674205		Cylc2 +-_2	0.71558					Cylc1 Y- Cylc2+-_4	0.669054
				Cylc1 KO_1	0.67504		Cylc2 +-_2	0.716689					Cylc1 Y- Cylc2+-_4	0.669327
				Cylc1 KO_1	0.678262		Cylc2 +-_2	0.722204					Cylc1 Y- Cylc2+-_4	0.670438
				Cylc1 KO_1	0.678998		Cylc2 +-_2	0.726071					Cylc1 Y- Cylc2+-_4	0.670821
				Cylc1 KO_1	0.679019		Cylc2 +-_2	0.738083					Cylc1 Y- Cylc2+-_4	0.671006
				Cylc1 KO_1	0.680271		Cylc2 +-_2	0.74052					Cylc1 Y- Cylc2+-_4	0.673352
				Cylc1 KO_1	0.684492		Cylc2 +-_2	0.741244					Cylc1 Y- Cylc2+-_4	0.676401
				Cylc1 KO_1	0.68528		Cylc2 +-_2	0.795854					Cylc1 Y- Cylc2+-_4	0.679959
				Cylc1 KO_1	0.68568								Cylc1 Y- Cylc2+-_4	0.680773
				Cylc1 KO_1	0.686732								Cylc1 Y- Cylc2+-_4	0.681895
				Cylc1 KO_1	0.687084								Cylc1 Y- Cylc2+-_4	0.681981
				Cylc1 KO_1	0.687149								Cylc1 Y- Cylc2+-_4	0.68289
				Cylc1 KO_1	0.688993								Cylc1 Y- Cylc2+-_4	0.684832
				Cylc1 KO_1	0.691304								Cylc1 Y- Cylc2+-_4	0.685271
				Cylc1 KO_1	0.693133								Cylc1 Y- Cylc2+-_4	0.685821
				Cylc1 KO_1	0.693629								Cylc1 Y- Cylc2+-_4	0.685953
				Cylc1 KO_1	0.693991								Cylc1 Y- Cylc2+-_4	0.687308
				Cylc1 KO_1	0.694581								Cylc1 Y- Cylc2+-_4	0.691884
				Cylc1 KO_1	0.694936								Cylc1 Y- Cylc2+-_4	0.691989
				Cylc1 KO_1	0.695012								Cylc1 Y- Cylc2+-_4	0.700592
				Cylc1 KO_1	0.69611								Cylc1 Y- Cylc2+-_4	0.70211
				Cylc1 KO_1	0.698129								Cylc1 Y- Cylc2+-_4	0.702329
				Cylc1 KO_1	0.700139								Cylc1 Y- Cylc2+-_4	0.708098
				Cylc1 KO_1	0.705367								Cylc1 Y- Cylc2+-_4	0.708238
				Cylc1 KO_1	0.705599								Cylc1 Y- Cylc2+-_4	0.70845
				Cylc1 KO_1	0.706578								Cylc1 Y- Cylc2+-_4	0.708549
				Cylc1 KO_1	0.708018								Cylc1 Y- Cylc2+-_4	0.709239
				Cylc1 KO_1	0.708678								Cylc1 Y- Cylc2+-_4	0.709659
				Cylc1 KO_1	0.709192								Cylc1 Y- Cylc2+-_4	0.71121
				Cylc1 KO_1	0.709909								Cylc1 Y- Cylc2+-_4	0.712789
				Cylc1 KO_1	0.713725								Cylc1 Y- Cylc2+-_4	0.732985
				Cylc1 KO_1	0.714041								Cylc1 Y- Cylc2+-_4	0.733882
				Cylc1 KO_1	0.714767								Cylc1 Y- Cylc2+-_4	0.752174
				Cylc1 KO_1	0.71562								Cylc1 Y- Cylc2+-_4	0.760003
				Cylc1 KO_1	0.716992								Cylc1 Y- Cylc2+-_4	0.762238
				Cylc1 KO_1	0.723273								Cylc1 Y- Cylc2+-_4	0.767126
				Cylc1 KO_1	0.724104								Cylc1 Y- Cylc2+-_4	0.768605
				Cylc1 KO_1	0.724367								Cylc1 Y- Cylc2+-_4	0.772562
				Cylc1 KO_1	0.725853								Cylc1 Y- Cylc2+-_4	0.773438
				Cylc1 KO_1	0.734808								Cylc1 Y- Cylc2+-_4	0.775587
				Cylc1 KO_1	0.739921								Cylc1 Y- Cylc2+-_4	0.785633
				Cylc1 KO_1	0.740505								Cylc1 Y- Cylc2+-_4	0.791333
				Cylc1 KO_1	0.742076								Cylc1 Y- Cylc2+-_4	0.793249
				Cylc1 KO_1	0.743974								Cylc1 Y- Cylc2+-_4	0.798103
				Cylc1 KO_1	0.750241
				Cylc1 KO_1	0.754425
				Cylc1 KO_1	0.754526
				Cylc1 KO_1	0.755611
				Cylc1 KO_1	0.758499
				Cylc1 KO_1	0.763394
				Cylc1 KO_1	0.767862
				Cylc1 KO_1	0.776151
				Cylc1 KO_1	0.790213
				Cylc1 KO_1	0.797202

## Sheet: Elongation
WT_0	-0.00256729		Cylc1 KO_1	-0.140278		Cylc2 +-_2	-0.106292		Cylc2 KO_3	-0.141943		Cylc1 Y- Cylc2+-_4	-0.175841		bKO_5	-0.277826
WT_0	0.0140237		Cylc1 KO_1	0.0067348		Cylc2 +-_2	-0.0819408		Cylc2 KO_3	-0.105605		Cylc1 Y- Cylc2+-_4	-0.0990286		dbKO_5	-0.138539
WT_0	0.0264691		Cylc1 KO_1	0.0162		Cylc2 +-_2	-0.0357713		Cylc2 KO_3	-0.0844962		Cylc1 Y- Cylc2+-_4	-0.0939405		dbKO_5	-0.0931852
WT_0	0.0472766		Cylc1 KO_1	0.0253271		Cylc2 +-_2	-0.0183477		Cylc2 KO_3	-0.0672178		Cylc1 Y- Cylc2+-_4	-0.0313856		dbKO_5	0.0117959
WT_0	0.054383		Cylc1 KO_1	0.0276162		Cylc2 +-_2	-0.00748859		Cylc2 KO_3	-0.060136		Cylc1 Y- Cylc2+-_4	-0.021927		dbKO_5	0.0188537
WT_0	0.0551486		Cylc1 KO_1	0.0290358		Cylc2 +-_2	0.00775593		Cylc2 KO_3	-0.0592445		Cylc1 Y- Cylc2+-_4	-0.0205319		dbKO_5	0.0288763
WT_0	0.055301		Cylc1 KO_1	0.0317373		Cylc2 +-_2	0.0139139		Cylc2 KO_3	-0.0531693		Cylc1 Y- Cylc2+-_4	0.00226666		dbKO_5	0.0313184
WT_0	0.056119		Cylc1 KO_1	0.0352929		Cylc2 +-_2	0.0251835		Cylc2 KO_3	-0.0475172		Cylc1 Y- Cylc2+-_4	0.0164369		dbKO_5	0.0347046
WT_0	0.0629449		Cylc1 KO_1	0.0359601		Cylc2 +-_2	0.0410619		Cylc2 KO_3	-0.045939		Cylc1 Y- Cylc2+-_4	0.0195787		dbKO_5	0.0360715
WT_0	0.065171		Cylc1 KO_1	0.0362843		Cylc2 +-_2	0.0505115		Cylc2 KO_3	-0.0402066		Cylc1 Y- Cylc2+-_4	0.0213571		dbKO_5	0.0409921
WT_0	0.0651997		Cylc1 KO_1	0.0367938		Cylc2 +-_2	0.0553371		Cylc2 KO_3	-0.0372859		Cylc1 Y- Cylc2+-_4	0.0221542		dbKO_5	0.0443962
WT_0	0.0712215		Cylc1 KO_1	0.0469591		Cylc2 +-_2	0.0687123		Cylc2 KO_3	-0.0324288		Cylc1 Y- Cylc2+-_4	0.0246176		dbKO_5	0.0468198
WT_0	0.0761867		Cylc1 KO_1	0.0478134		Cylc2 +-_2	0.0700556		Cylc2 KO_3	-0.0281936		Cylc1 Y- Cylc2+-_4	0.0260274		dbKO_5	0.0483537
WT_0	0.0770165		Cylc1 KO_1	0.0501568		Cylc2 +-_2	0.0753827		Cylc2 KO_3	-0.019431		Cylc1 Y- Cylc2+-_4	0.032503		dbKO_5	0.0485301
WT_0	0.0832014		Cylc1 KO_1	0.0680804		Cylc2 +-_2	0.084458		Cylc2 KO_3	-0.0179317		Cylc1 Y- Cylc2+-_4	0.0328806		dbKO_5	0.0523038
WT_0	0.0839633		Cylc1 KO_1	0.0698526		Cylc2 +-_2	0.0860221		Cylc2 KO_3	-0.0132382		Cylc1 Y- Cylc2+-_4	0.038517		dbKO_5	0.052376
WT_0	0.0853169		Cylc1 KO_1	0.0721433		Cylc2 +-_2	0.0865786		Cylc2 KO_3	-2.69125e+11		Cylc1 Y- Cylc2+-_4	0.0398501		dbKO_5	0.0545136
WT_0	0.0854673		Cylc1 KO_1	0.072274		Cylc2 +-_2	0.0897962		Cylc2 KO_3	0.00174815		Cylc1 Y- Cylc2+-_4	0.0404857		dbKO_5	0.0552208
WT_0	0.0859289		Cylc1 KO_1	0.0735445		Cylc2 +-_2	0.094724		Cylc2 KO_3	0.00243247		Cylc1 Y- Cylc2+-_4	0.0413332		dbKO_5	0.0566448
WT_0	0.0892442		Cylc1 KO_1	0.073647		Cylc2 +-_2	0.0950127		Cylc2 KO_3	0.00420486		Cylc1 Y- Cylc2+-_4	0.04225		dbKO_5	0.0568829
WT_0	0.09271		Cylc1 KO_1	0.0746929		Cylc2 +-_2	0.0966187		Cylc2 KO_3	0.00833973		Cylc1 Y- Cylc2+-_4	0.044908		dbKO_5	0.0569967
WT_0	0.0931503		Cylc1 KO_1	0.0747836		Cylc2 +-_2	0.0974972		Cylc2 KO_3	0.0110437		Cylc1 Y- Cylc2+-_4	0.0449576		dbKO_5	0.057123
WT_0	0.0933082		Cylc1 KO_1	0.0767568		Cylc2 +-_2	0.0980025		Cylc2 KO_3	0.0146757		Cylc1 Y- Cylc2+-_4	0.0457792		dbKO_5	0.0586157
WT_0	0.0945207		Cylc1 KO_1	0.0774825		Cylc2 +-_2	0.0982808		Cylc2 KO_3	0.0219366		Cylc1 Y- Cylc2+-_4	0.0491388		dbKO_5	0.0591187
WT_0	0.0946803		Cylc1 KO_1	0.0785838		Cylc2 +-_2	0.100117		Cylc2 KO_3	0.0236912		Cylc1 Y- Cylc2+-_4	0.0497476		dbKO_5	0.0628494
WT_0	0.0955031		Cylc1 KO_1	0.0787388		Cylc2 +-_2	0.102874		Cylc2 KO_3	0.0240874		Cylc1 Y- Cylc2+-_4	0.0523231		dbKO_5	0.0634418
WT_0	0.0987575		Cylc1 KO_1	0.0813		Cylc2 +-_2	0.103573		Cylc2 KO_3	0.0275995		Cylc1 Y- Cylc2+-_4	0.0524807		dbKO_5	0.0652053
WT_0	0.0994121		Cylc1 KO_1	0.0825532		Cylc2 +-_2	0.104377		Cylc2 KO_3	0.0282724		Cylc1 Y- Cylc2+-_4	0.0528147		dbKO_5	0.0654412
WT_0	0.100691		Cylc1 KO_1	0.082654		Cylc2 +-_2	0.111684		Cylc2 KO_3	0.0293593		Cylc1 Y- Cylc2+-_4	0.0566423		dbKO_5	0.0658211
WT_0	0.100863		Cylc1 KO_1	0.085871		Cylc2 +-_2	0.114179		Cylc2 KO_3	0.0296993		Cylc1 Y- Cylc2+-_4	0.0627272		dbKO_5	0.0663085
WT_0	0.101438		Cylc1 KO_1	0.0858775		Cylc2 +-_2	0.115745		Cylc2 KO_3	0.0317395		Cylc1 Y- Cylc2+-_4	0.0629125		dbKO_5	0.0664183
WT_0	0.101964		Cylc1 KO_1	0.0869084		Cylc2 +-_2	0.11653		Cylc2 KO_3	0.0324459		Cylc1 Y- Cylc2+-_4	0.0630405		dbKO_5	0.0675972
WT_0	0.102545		Cylc1 KO_1	0.086977		Cylc2 +-_2	0.116935		Cylc2 KO_3	0.0331807		Cylc1 Y- Cylc2+-_4	0.0653201		dbKO_5	0.0676784
WT_0	0.103896		Cylc1 KO_1	0.0885009		Cylc2 +-_2	0.119761		Cylc2 KO_3	0.0391766		Cylc1 Y- Cylc2+-_4	0.0679561		dbKO_5	0.0688745
WT_0	0.104679		Cylc1 KO_1	0.0889142		Cylc2 +-_2	0.120757		Cylc2 KO_3	0.039972		Cylc1 Y- Cylc2+-_4	0.0725159		dbKO_5	0.069927
WT_0	0.107126		Cylc1 KO_1	0.0908627		Cylc2 +-_2	0.124043		Cylc2 KO_3	0.0410539		Cylc1 Y- Cylc2+-_4	0.0742475		dbKO_5	0.0701473
WT_0	0.108896		Cylc1 KO_1	0.0909729		Cylc2 +-_2	0.124437		Cylc2 KO_3	0.041558		Cylc1 Y- Cylc2+-_4	0.0752122		dbKO_5	0.0714944
WT_0	0.109486		Cylc1 KO_1	0.0911324		Cylc2 +-_2	0.12536		Cylc2 KO_3	0.0431621		Cylc1 Y- Cylc2+-_4	0.075774		dbKO_5	0.0716946
WT_0	0.109715		Cylc1 KO_1	0.0916903		Cylc2 +-_2	0.126112		Cylc2 KO_3	0.0479661		Cylc1 Y- Cylc2+-_4	0.0758836		dbKO_5	0.0720101
WT_0	0.110483		Cylc1 KO_1	0.0919045		Cylc2 +-_2	0.126611		Cylc2 KO_3	0.050548		Cylc1 Y- Cylc2+-_4	0.0762588		dbKO_5	0.07212
WT_0	0.110789		Cylc1 KO_1	0.0922107		Cylc2 +-_2	0.127957		Cylc2 KO_3	0.0516337		Cylc1 Y- Cylc2+-_4	0.0778404		dbKO_5	0.0721729
WT_0	0.110872		Cylc1 KO_1	0.0933446		Cylc2 +-_2	0.129502		Cylc2 KO_3	0.0536042		Cylc1 Y- Cylc2+-_4	0.0779836		dbKO_5	0.0722703
WT_0	0.110932		Cylc1 KO_1	0.0935723		Cylc2 +-_2	0.129519		Cylc2 KO_3	0.0541994		Cylc1 Y- Cylc2+-_4	0.0781775		dbKO_5	0.0725126
WT_0	0.111026		Cylc1 KO_1	0.0952989		Cylc2 +-_2	0.130052		Cylc2 KO_3	0.0549275		Cylc1 Y- Cylc2+-_4	0.0790179		dbKO_5	0.0732626
WT_0	0.111031		Cylc1 KO_1	0.0965708		Cylc2 +-_2	0.130109		Cylc2 KO_3	0.05567		Cylc1 Y- Cylc2+-_4	0.0791396		dbKO_5	0.0734356
WT_0	0.111319		Cylc1 KO_1	0.0967151		Cylc2 +-_2	0.130373		Cylc2 KO_3	0.0605411		Cylc1 Y- Cylc2+-_4	0.0805702		dbKO_5	0.0746397
WT_0	0.111971		Cylc1 KO_1	0.098851		Cylc2 +-_2	0.131677		Cylc2 KO_3	0.061464		Cylc1 Y- Cylc2+-_4	0.0814028		dbKO_5	0.0747135
WT_0	0.113132		Cylc1 KO_1	0.0989984		Cylc2 +-_2	0.131773		Cylc2 KO_3	0.0622983		Cylc1 Y- Cylc2+-_4	0.0815353		dbKO_5	0.0749108
WT_0	0.114364		Cylc1 KO_1	0.100343		Cylc2 +-_2	0.13202		Cylc2 KO_3	0.0677321		Cylc1 Y- Cylc2+-_4	0.0833407		dbKO_5	0.0754409
WT_0	0.114597		Cylc1 KO_1	0.101113		Cylc2 +-_2	0.132142		Cylc2 KO_3	0.0678976		Cylc1 Y- Cylc2+-_4	0.0834025		dbKO_5	0.0754875
WT_0	0.114652		Cylc1 KO_1	0.101207		Cylc2 +-_2	0.132313		Cylc2 KO_3	0.0693801		Cylc1 Y- Cylc2+-_4	0.0842093		dbKO_5	0.0754885
WT_0	0.114826		Cylc1 KO_1	0.101457		Cylc2 +-_2	0.13335		Cylc2 KO_3	0.069464		Cylc1 Y- Cylc2+-_4	0.0842736		dbKO_5	0.076389
WT_0	0.114909		Cylc1 KO_1	0.101649		Cylc2 +-_2	0.134126		Cylc2 KO_3	0.0698925		Cylc1 Y- Cylc2+-_4	0.084465		dbKO_5	0.0764607
WT_0	0.115169		Cylc1 KO_1	0.102613		Cylc2 +-_2	0.134492		Cylc2 KO_3	0.0699069		Cylc1 Y- Cylc2+-_4	0.084619		dbKO_5	0.0773536
WT_0	0.115685		Cylc1 KO_1	0.10486		Cylc2 +-_2	0.139119		Cylc2 KO_3	0.0704684		Cylc1 Y- Cylc2+-_4	0.0862414		dbKO_5	0.0777941
WT_0	0.115903		Cylc1 KO_1	0.105113		Cylc2 +-_2	0.139334		Cylc2 KO_3	0.0765908		Cylc1 Y- Cylc2+-_4	0.0894472		dbKO_5	0.0779485
WT_0	0.116426		Cylc1 KO_1	0.105461		Cylc2 +-_2	0.139373		Cylc2 KO_3	0.0775771		Cylc1 Y- Cylc2+-_4	0.0897295		dbKO_5	0.078012
WT_0	0.116603		Cylc1 KO_1	0.106415		Cylc2 +-_2	0.139841		Cylc2 KO_3	0.0777412		Cylc1 Y- Cylc2+-_4	0.0908203		dbKO_5	0.0784258
WT_0	0.116806		Cylc1 KO_1	0.106495		Cylc2 +-_2	0.14009		Cylc2 KO_3	0.0794831		Cylc1 Y- Cylc2+-_4	0.0919207		dbKO_5	0.0785125
WT_0	0.117012		Cylc1 KO_1	0.107008		Cylc2 +-_2	0.140772		Cylc2 KO_3	0.0810635		Cylc1 Y- Cylc2+-_4	0.0931004		dbKO_5	0.0801464
WT_0	0.11776		Cylc1 KO_1	0.107045		Cylc2 +-_2	0.14094		Cylc2 KO_3	0.081278		Cylc1 Y- Cylc2+-_4	0.093488		dbKO_5	0.0804597
WT_0	0.119524		Cylc1 KO_1	0.10732		Cylc2 +-_2	0.141454		Cylc2 KO_3	0.084021		Cylc1 Y- Cylc2+-_4	0.0954028		dbKO_5	0.0807319
WT_0	0.12073		Cylc1 KO_1	0.107806		Cylc2 +-_2	0.141815		Cylc2 KO_3	0.0841804		Cylc1 Y- Cylc2+-_4	0.096129		dbKO_5	0.0811046
WT_0	0.120859		Cylc1 KO_1	0.108521		Cylc2 +-_2	0.142378		Cylc2 KO_3	0.0845062		Cylc1 Y- Cylc2+-_4	0.0964434		dbKO_5	0.0812627
WT_0	0.122638		Cylc1 KO_1	0.108632		Cylc2 +-_2	0.142618		Cylc2 KO_3	0.0856037		Cylc1 Y- Cylc2+-_4	0.0964574		dbKO_5	0.0816032
WT_0	0.123836		Cylc1 KO_1	0.109575		Cylc2 +-_2	0.143032		Cylc2 KO_3	0.0868755		Cylc1 Y- Cylc2+-_4	0.0969026		dbKO_5	0.0820585
WT_0	0.123863		Cylc1 KO_1	0.109583		Cylc2 +-_2	0.144755		Cylc2 KO_3	0.0888334		Cylc1 Y- Cylc2+-_4	0.0970558		dbKO_5	0.0822619
WT_0	0.124177		Cylc1 KO_1	0.110006		Cylc2 +-_2	0.145283		Cylc2 KO_3	0.0898653		Cylc1 Y- Cylc2+-_4	0.0971369		dbKO_5	0.0826716
WT_0	0.124791		Cylc1 KO_1	0.110129		Cylc2 +-_2	0.146954		Cylc2 KO_3	0.0903461		Cylc1 Y- Cylc2+-_4	0.0978661		dbKO_5	0.084502
WT_0	0.124934		Cylc1 KO_1	0.110978		Cylc2 +-_2	0.148178		Cylc2 KO_3	0.0908485		Cylc1 Y- Cylc2+-_4	0.097937		dbKO_5	0.0846027
WT_0	0.12573		Cylc1 KO_1	0.112646		Cylc2 +-_2	0.149098		Cylc2 KO_3	0.0913176		Cylc1 Y- Cylc2+-_4	0.0982105		dbKO_5	0.0852839
WT_0	0.125935		Cylc1 KO_1	0.112931		Cylc2 +-_2	0.149531		Cylc2 KO_3	0.0916681		Cylc1 Y- Cylc2+-_4	0.0984438		dbKO_5	0.0861062
WT_0	0.126289		Cylc1 KO_1	0.113046		Cylc2 +-_2	0.152033		Cylc2 KO_3	0.0918365		Cylc1 Y- Cylc2+-_4	0.099057		dbKO_5	0.0863679
WT_0	0.126366		Cylc1 KO_1	0.114307		Cylc2 +-_2	0.152118		Cylc2 KO_3	0.0992834		Cylc1 Y- Cylc2+-_4	0.0992269		dbKO_5	0.086378
WT_0	0.127147		Cylc1 KO_1	0.114409		Cylc2 +-_2	0.152763		Cylc2 KO_3	0.10278		Cylc1 Y- Cylc2+-_4	0.0997241		dbKO_5	0.0868288
WT_0	0.130863		Cylc1 KO_1	0.114969		Cylc2 +-_2	0.152941		Cylc2 KO_3	0.102825		Cylc1 Y- Cylc2+-_4	0.10181		dbKO_5	0.08695
WT_0	0.131117		Cylc1 KO_1	0.115169		Cylc2 +-_2	0.154056		Cylc2 KO_3	0.105072		Cylc1 Y- Cylc2+-_4	0.102772		dbKO_5	0.0871885
WT_0	0.13125		Cylc1 KO_1	0.11547		Cylc2 +-_2	0.154993		Cylc2 KO_3	0.105151		Cylc1 Y- Cylc2+-_4	0.103566		dbKO_5	0.0873087
WT_0	0.131336		Cylc1 KO_1	0.115975		Cylc2 +-_2	0.15511		Cylc2 KO_3	0.107345		Cylc1 Y- Cylc2+-_4	0.105658		dbKO_5	0.0876331
WT_0	0.132191		Cylc1 KO_1	0.116022		Cylc2 +-_2	0.155534		Cylc2 KO_3	0.11664		Cylc1 Y- Cylc2+-_4	0.106818		dbKO_5	0.0881381
WT_0	0.132403		Cylc1 KO_1	0.116111		Cylc2 +-_2	0.155838		Cylc2 KO_3	0.117701		Cylc1 Y- Cylc2+-_4	0.107058		dbKO_5	0.0883348
WT_0	0.134442		Cylc1 KO_1	0.11655		Cylc2 +-_2	0.156118		Cylc2 KO_3	0.120358		Cylc1 Y- Cylc2+-_4	0.107663		dbKO_5	0.0886152
WT_0	0.134779		Cylc1 KO_1	0.116553		Cylc2 +-_2	0.156397		Cylc2 KO_3	0.130384		Cylc1 Y- Cylc2+-_4	0.107885		dbKO_5	0.0900049
WT_0	0.134893		Cylc1 KO_1	0.116746		Cylc2 +-_2	0.156507		Cylc2 KO_3	0.130828		Cylc1 Y- Cylc2+-_4	0.107936		dbKO_5	0.0900644
WT_0	0.135131		Cylc1 KO_1	0.116864		Cylc2 +-_2	0.156768		Cylc2 KO_3	0.133477		Cylc1 Y- Cylc2+-_4	0.108142		dbKO_5	0.0901974
WT_0	0.135641		Cylc1 KO_1	0.117519		Cylc2 +-_2	0.157089		Cylc2 KO_3	0.138923		Cylc1 Y- Cylc2+-_4	0.108248		dbKO_5	0.0903427
WT_0	0.136269		Cylc1 KO_1	0.118068		Cylc2 +-_2	0.157432		Cylc2 KO_3	0.140528		Cylc1 Y- Cylc2+-_4	0.109462		dbKO_5	0.0904856
WT_0	0.136374		Cylc1 KO_1	0.118274		Cylc2 +-_2	0.158103		Cylc2 KO_3	0.141118		Cylc1 Y- Cylc2+-_4	0.109839		dbKO_5	0.0908459
WT_0	0.137156		Cylc1 KO_1	0.11876		Cylc2 +-_2	0.159577		Cylc2 KO_3	0.143212		Cylc1 Y- Cylc2+-_4	0.110482		dbKO_5	0.090924
WT_0	0.137696		Cylc1 KO_1	0.119376		Cylc2 +-_2	0.161054		Cylc2 KO_3	0.145537		Cylc1 Y- Cylc2+-_4	0.111626		dbKO_5	0.0918178
WT_0	0.138545		Cylc1 KO_1	0.11939		Cylc2 +-_2	0.163121		Cylc2 KO_3	0.146484		Cylc1 Y- Cylc2+-_4	0.112668		dbKO_5	0.091857
WT_0	0.138663		Cylc1 KO_1	0.119451		Cylc2 +-_2	0.163144		Cylc2 KO_3	0.147942		Cylc1 Y- Cylc2+-_4	0.113059		dbKO_5	0.0919707
WT_0	0.138948		Cylc1 KO_1	0.119507		Cylc2 +-_2	0.163462		Cylc2 KO_3	0.152912		Cylc1 Y- Cylc2+-_4	0.113309		dbKO_5	0.0922903
WT_0	0.13936		Cylc1 KO_1	0.120052		Cylc2 +-_2	0.163774		Cylc2 KO_3	0.154199		Cylc1 Y- Cylc2+-_4	0.113748		dbKO_5	0.0923898
WT_0	0.139437		Cylc1 KO_1	0.120425		Cylc2 +-_2	0.164381		Cylc2 KO_3	0.155049		Cylc1 Y- Cylc2+-_4	0.114284		dbKO_5	0.0926045
WT_0	0.140156		Cylc1 KO_1	0.120993		Cylc2 +-_2	0.164408		Cylc2 KO_3	0.160135		Cylc1 Y- Cylc2+-_4	0.115978		dbKO_5	0.0927227
WT_0	0.140499		Cylc1 KO_1	0.12148		Cylc2 +-_2	0.165542		Cylc2 KO_3	0.166076		Cylc1 Y- Cylc2+-_4	0.116415		dbKO_5	0.0929952
WT_0	0.140801		Cylc1 KO_1	0.122126		Cylc2 +-_2	0.16577		Cylc2 KO_3	0.166497		Cylc1 Y- Cylc2+-_4	0.117005		dbKO_5	0.0929962
WT_0	0.140852		Cylc1 KO_1	0.122202		Cylc2 +-_2	0.165795		Cylc2 KO_3	0.169204		Cylc1 Y- Cylc2+-_4	0.118202		dbKO_5	0.0935982
WT_0	0.141685		Cylc1 KO_1	0.122352		Cylc2 +-_2	0.167309		Cylc2 KO_3	0.169258		Cylc1 Y- Cylc2+-_4	0.118514		dbKO_5	0.0938343
WT_0	0.14263		Cylc1 KO_1	0.122506		Cylc2 +-_2	0.167376		Cylc2 KO_3	0.169402		Cylc1 Y- Cylc2+-_4	0.118863		dbKO_5	0.0941833
WT_0	0.142878		Cylc1 KO_1	0.122668		Cylc2 +-_2	0.169535		Cylc2 KO_3	0.170287		Cylc1 Y- Cylc2+-_4	0.118863		dbKO_5	0.0961245
WT_0	0.143543		Cylc1 KO_1	0.123239		Cylc2 +-_2	0.169858		Cylc2 KO_3	0.175591		Cylc1 Y- Cylc2+-_4	0.118902		dbKO_5	0.096935
WT_0	0.144097		Cylc1 KO_1	0.123663		Cylc2 +-_2	0.170587		Cylc2 KO_3	0.176264		Cylc1 Y- Cylc2+-_4	0.119128		dbKO_5	0.0974947
WT_0	0.144271		Cylc1 KO_1	0.123778		Cylc2 +-_2	0.170608		Cylc2 KO_3	0.176954		Cylc1 Y- Cylc2+-_4	0.119708		dbKO_5	0.0990267
WT_0	0.144381		Cylc1 KO_1	0.124276		Cylc2 +-_2	0.170742		Cylc2 KO_3	0.176958		Cylc1 Y- Cylc2+-_4	0.120515		dbKO_5	0.0990775
WT_0	0.14486		Cylc1 KO_1	0.124567		Cylc2 +-_2	0.170755		Cylc2 KO_3	0.180228		Cylc1 Y- Cylc2+-_4	0.120549		dbKO_5	0.099232
WT_0	0.145714		Cylc1 KO_1	0.12578		Cylc2 +-_2	0.17078		Cylc2 KO_3	0.182334		Cylc1 Y- Cylc2+-_4	0.12094		dbKO_5	0.10135
WT_0	0.146208		Cylc1 KO_1	0.125834		Cylc2 +-_2	0.171698		Cylc2 KO_3	0.18534		Cylc1 Y- Cylc2+-_4	0.122072		dbKO_5	0.101548
WT_0	0.146838		Cylc1 KO_1	0.126025		Cylc2 +-_2	0.171736		Cylc2 KO_3	0.188218		Cylc1 Y- Cylc2+-_4	0.122373		dbKO_5	0.102272
WT_0	0.147361		Cylc1 KO_1	0.126818		Cylc2 +-_2	0.173081		Cylc2 KO_3	0.18915		Cylc1 Y- Cylc2+-_4	0.122723		dbKO_5	0.103407
WT_0	0.148162		Cylc1 KO_1	0.126821		Cylc2 +-_2	0.173944		Cylc2 KO_3	0.189517		Cylc1 Y- Cylc2+-_4	0.123298		dbKO_5	0.103637
WT_0	0.149866		Cylc1 KO_1	0.126988		Cylc2 +-_2	0.174018		Cylc2 KO_3	0.195854		Cylc1 Y- Cylc2+-_4	0.124381		dbKO_5	0.104416
WT_0	0.149945		Cylc1 KO_1	0.127188		Cylc2 +-_2	0.174386		Cylc2 KO_3	0.198668		Cylc1 Y- Cylc2+-_4	0.124675		dbKO_5	0.104659
WT_0	0.150217		Cylc1 KO_1	0.127465		Cylc2 +-_2	0.176602		Cylc2 KO_3	0.199571		Cylc1 Y- Cylc2+-_4	0.125607		dbKO_5	0.105527
WT_0	0.150272		Cylc1 KO_1	0.127474		Cylc2 +-_2	0.177444		Cylc2 KO_3	0.20211		Cylc1 Y- Cylc2+-_4	0.12599		dbKO_5	0.105621
WT_0	0.151192		Cylc1 KO_1	0.128281		Cylc2 +-_2	0.177937		Cylc2 KO_3	0.205519		Cylc1 Y- Cylc2+-_4	0.126201		dbKO_5	0.105996
WT_0	0.152091		Cylc1 KO_1	0.129322		Cylc2 +-_2	0.178105		Cylc2 KO_3	0.206172		Cylc1 Y- Cylc2+-_4	0.126218		dbKO_5	0.106259
WT_0	0.152408		Cylc1 KO_1	0.129463		Cylc2 +-_2	0.178409		Cylc2 KO_3	0.210988		Cylc1 Y- Cylc2+-_4	0.126344		dbKO_5	0.106908
WT_0	0.152878		Cylc1 KO_1	0.129619		Cylc2 +-_2	0.178592		Cylc2 KO_3	0.214078		Cylc1 Y- Cylc2+-_4	0.126366		dbKO_5	0.107967
WT_0	0.152918		Cylc1 KO_1	0.129875		Cylc2 +-_2	0.178829		Cylc2 KO_3	0.221596		Cylc1 Y- Cylc2+-_4	0.126493		dbKO_5	0.10881
WT_0	0.15311		Cylc1 KO_1	0.130742		Cylc2 +-_2	0.1791		Cylc2 KO_3	0.224308		Cylc1 Y- Cylc2+-_4	0.126816		dbKO_5	0.10934
WT_0	0.153507		Cylc1 KO_1	0.131878		Cylc2 +-_2	0.179144		Cylc2 KO_3	0.226634		Cylc1 Y- Cylc2+-_4	0.126857		dbKO_5	0.109467
WT_0	0.153656		Cylc1 KO_1	0.132328		Cylc2 +-_2	0.179442		Cylc2 KO_3	0.229129		Cylc1 Y- Cylc2+-_4	0.127236		dbKO_5	0.109627
WT_0	0.154015		Cylc1 KO_1	0.132641		Cylc2 +-_2	0.179643		Cylc2 KO_3	0.230063		Cylc1 Y- Cylc2+-_4	0.127238		dbKO_5	0.109763
WT_0	0.154455		Cylc1 KO_1	0.13359		Cylc2 +-_2	0.180218		Cylc2 KO_3	0.233173		Cylc1 Y- Cylc2+-_4	0.127683		dbKO_5	0.109906
WT_0	0.154847		Cylc1 KO_1	0.134279		Cylc2 +-_2	0.180606		Cylc2 KO_3	0.233351		Cylc1 Y- Cylc2+-_4	0.128904		dbKO_5	0.110089
WT_0	0.154911		Cylc1 KO_1	0.134318		Cylc2 +-_2	0.18075		Cylc2 KO_3	0.24235		Cylc1 Y- Cylc2+-_4	0.129366		dbKO_5	0.111184
WT_0	0.155054		Cylc1 KO_1	0.134414		Cylc2 +-_2	0.181573		Cylc2 KO_3	0.251807		Cylc1 Y- Cylc2+-_4	0.129906		dbKO_5	0.11313
WT_0	0.155062		Cylc1 KO_1	0.134553		Cylc2 +-_2	0.181992		Cylc2 KO_3	0.253463		Cylc1 Y- Cylc2+-_4	0.130239		dbKO_5	0.113517
WT_0	0.155431		Cylc1 KO_1	0.134783		Cylc2 +-_2	0.182491		Cylc2 KO_3	0.254563		Cylc1 Y- Cylc2+-_4	0.130965		dbKO_5	0.113969
WT_0	0.15573		Cylc1 KO_1	0.13484		Cylc2 +-_2	0.183154		Cylc2 KO_3	0.258319		Cylc1 Y- Cylc2+-_4	0.131377		dbKO_5	0.114365
WT_0	0.156099		Cylc1 KO_1	0.135173		Cylc2 +-_2	0.183297		Cylc2 KO_3	0.262559		Cylc1 Y- Cylc2+-_4	0.131494		dbKO_5	0.115362
WT_0	0.156133		Cylc1 KO_1	0.135436		Cylc2 +-_2	0.183466		Cylc2 KO_3	0.262931		Cylc1 Y- Cylc2+-_4	0.131545		dbKO_5	0.115467
WT_0	0.156995		Cylc1 KO_1	0.135758		Cylc2 +-_2	0.183733		Cylc2 KO_3	0.26351		Cylc1 Y- Cylc2+-_4	0.131593		dbKO_5	0.11643
WT_0	0.157605		Cylc1 KO_1	0.136666		Cylc2 +-_2	0.184012		Cylc2 KO_3	0.2645		Cylc1 Y- Cylc2+-_4	0.13201		dbKO_5	0.117306
WT_0	0.15849		Cylc1 KO_1	0.136689		Cylc2 +-_2	0.184202		Cylc2 KO_3	0.264893		Cylc1 Y- Cylc2+-_4	0.132627		dbKO_5	0.117383
WT_0	0.159166		Cylc1 KO_1	0.136891		Cylc2 +-_2	0.184769		Cylc2 KO_3	0.276238		Cylc1 Y- Cylc2+-_4	0.133454		dbKO_5	0.117441
WT_0	0.159192		Cylc1 KO_1	0.137017		Cylc2 +-_2	0.185215		Cylc2 KO_3	0.279409		Cylc1 Y- Cylc2+-_4	0.134058		dbKO_5	0.118284
WT_0	0.159719		Cylc1 KO_1	0.137676		Cylc2 +-_2	0.185501		Cylc2 KO_3	0.286746		Cylc1 Y- Cylc2+-_4	0.135358		dbKO_5	0.118631
WT_0	0.160379		Cylc1 KO_1	0.13777		Cylc2 +-_2	0.185632		Cylc2 KO_3	0.308211		Cylc1 Y- Cylc2+-_4	0.135721		dbKO_5	0.119039
WT_0	0.160431		Cylc1 KO_1	0.137825		Cylc2 +-_2	0.185955		Cylc2 KO_3	0.308377		Cylc1 Y- Cylc2+-_4	0.136507		dbKO_5	0.119507
WT_0	0.16056		Cylc1 KO_1	0.137848		Cylc2 +-_2	0.186199		Cylc2 KO_3	0.315194		Cylc1 Y- Cylc2+-_4	0.136713		dbKO_5	0.119614
WT_0	0.161124		Cylc1 KO_1	0.139219		Cylc2 +-_2	0.18741		Cylc2 KO_3	0.317287		Cylc1 Y- Cylc2+-_4	0.136899		dbKO_5	0.120207
WT_0	0.16156		Cylc1 KO_1	0.139503		Cylc2 +-_2	0.187566		Cylc2 KO_3	0.32315		Cylc1 Y- Cylc2+-_4	0.137586		dbKO_5	0.120332
WT_0	0.161647		Cylc1 KO_1	0.139835		Cylc2 +-_2	0.188788		Cylc2 KO_3	0.37506		Cylc1 Y- Cylc2+-_4	0.137655		dbKO_5	0.120521
WT_0	0.161789		Cylc1 KO_1	0.140172		Cylc2 +-_2	0.188902		Cylc2 KO_3	0.378726		Cylc1 Y- Cylc2+-_4	0.137886		dbKO_5	0.120606
WT_0	0.161992		Cylc1 KO_1	0.14083		Cylc2 +-_2	0.188946		Cylc2 KO_3	0.454832		Cylc1 Y- Cylc2+-_4	0.138199		dbKO_5	0.121267
WT_0	0.16224		Cylc1 KO_1	0.141312		Cylc2 +-_2	0.18994		Cylc2 KO_3	0.459469		Cylc1 Y- Cylc2+-_4	0.138283		dbKO_5	0.121462
WT_0	0.162258		Cylc1 KO_1	0.141551		Cylc2 +-_2	0.190958					Cylc1 Y- Cylc2+-_4	0.138318		dbKO_5	0.121836
WT_0	0.163775		Cylc1 KO_1	0.141732		Cylc2 +-_2	0.19124					Cylc1 Y- Cylc2+-_4	0.138613		dbKO_5	0.122103
WT_0	0.164973		Cylc1 KO_1	0.141964		Cylc2 +-_2	0.191543					Cylc1 Y- Cylc2+-_4	0.138998		dbKO_5	0.122436
WT_0	0.165592		Cylc1 KO_1	0.142889		Cylc2 +-_2	0.192625					Cylc1 Y- Cylc2+-_4	0.139281		dbKO_5	0.123336
WT_0	0.167053		Cylc1 KO_1	0.142952		Cylc2 +-_2	0.193543					Cylc1 Y- Cylc2+-_4	0.139412		dbKO_5	0.123815
WT_0	0.16717		Cylc1 KO_1	0.144065		Cylc2 +-_2	0.194009					Cylc1 Y- Cylc2+-_4	0.14085		dbKO_5	0.123898
WT_0	0.167649		Cylc1 KO_1	0.144256		Cylc2 +-_2	0.194673					Cylc1 Y- Cylc2+-_4	0.14086		dbKO_5	0.125162
WT_0	0.168342		Cylc1 KO_1	0.144619		Cylc2 +-_2	0.195844					Cylc1 Y- Cylc2+-_4	0.141314		dbKO_5	0.125242
WT_0	0.168642		Cylc1 KO_1	0.145621		Cylc2 +-_2	0.195975					Cylc1 Y- Cylc2+-_4	0.141434		dbKO_5	0.12538
WT_0	0.168749		Cylc1 KO_1	0.146348		Cylc2 +-_2	0.19602					Cylc1 Y- Cylc2+-_4	0.144994		dbKO_5	0.125571
WT_0	0.168782		Cylc1 KO_1	0.146795		Cylc2 +-_2	0.196043					Cylc1 Y- Cylc2+-_4	0.145598		dbKO_5	0.128531
WT_0	0.168942		Cylc1 KO_1	0.147322		Cylc2 +-_2	0.196332					Cylc1 Y- Cylc2+-_4	0.146621		dbKO_5	0.129273
WT_0	0.169245		Cylc1 KO_1	0.147536		Cylc2 +-_2	0.196721					Cylc1 Y- Cylc2+-_4	0.148369		dbKO_5	0.129448
WT_0	0.169845		Cylc1 KO_1	0.147927		Cylc2 +-_2	0.197021					Cylc1 Y- Cylc2+-_4	0.148574		dbKO_5	0.131119
WT_0	0.169865		Cylc1 KO_1	0.148352		Cylc2 +-_2	0.197674					Cylc1 Y- Cylc2+-_4	0.148626		dbKO_5	0.132098
WT_0	0.170149		Cylc1 KO_1	0.148393		Cylc2 +-_2	0.197702					Cylc1 Y- Cylc2+-_4	0.14885		dbKO_5	0.132352
WT_0	0.171611		Cylc1 KO_1	0.14949		Cylc2 +-_2	0.197786					Cylc1 Y- Cylc2+-_4	0.148955		dbKO_5	0.13299
WT_0	0.171758		Cylc1 KO_1	0.14971		Cylc2 +-_2	0.197812					Cylc1 Y- Cylc2+-_4	0.149401		dbKO_5	0.135434
WT_0	0.172346		Cylc1 KO_1	0.149791		Cylc2 +-_2	0.197826					Cylc1 Y- Cylc2+-_4	0.149571		dbKO_5	0.135944
WT_0	0.172528		Cylc1 KO_1	0.15015		Cylc2 +-_2	0.198691					Cylc1 Y- Cylc2+-_4	0.151324		dbKO_5	0.136286
WT_0	0.17277		Cylc1 KO_1	0.150513		Cylc2 +-_2	0.199123					Cylc1 Y- Cylc2+-_4	0.151683		dbKO_5	0.137036
WT_0	0.1729		Cylc1 KO_1	0.150552		Cylc2 +-_2	0.199126					Cylc1 Y- Cylc2+-_4	0.15277		dbKO_5	0.138665
WT_0	0.173172		Cylc1 KO_1	0.15089		Cylc2 +-_2	0.200696					Cylc1 Y- Cylc2+-_4	0.152828		dbKO_5	0.139079
WT_0	0.174125		Cylc1 KO_1	0.15109		Cylc2 +-_2	0.201072					Cylc1 Y- Cylc2+-_4	0.152928		dbKO_5	0.139343
WT_0	0.174358		Cylc1 KO_1	0.151197		Cylc2 +-_2	0.201182					Cylc1 Y- Cylc2+-_4	0.153769		dbKO_5	0.140482
WT_0	0.174906		Cylc1 KO_1	0.152058		Cylc2 +-_2	0.202096					Cylc1 Y- Cylc2+-_4	0.153807		dbKO_5	0.141349
WT_0	0.175084		Cylc1 KO_1	0.153437		Cylc2 +-_2	0.203614					Cylc1 Y- Cylc2+-_4	0.153961		dbKO_5	0.14227
WT_0	0.175495		Cylc1 KO_1	0.153853		Cylc2 +-_2	0.203898					Cylc1 Y- Cylc2+-_4	0.154216		dbKO_5	0.143018
WT_0	0.176011		Cylc1 KO_1	0.153943		Cylc2 +-_2	0.204637					Cylc1 Y- Cylc2+-_4	0.154219		dbKO_5	0.143821
WT_0	0.178705		Cylc1 KO_1	0.154291		Cylc2 +-_2	0.204726					Cylc1 Y- Cylc2+-_4	0.154654		dbKO_5	0.144124
WT_0	0.178926		Cylc1 KO_1	0.154292		Cylc2 +-_2	0.205659					Cylc1 Y- Cylc2+-_4	0.15545		dbKO_5	0.146775
WT_0	0.178989		Cylc1 KO_1	0.154608		Cylc2 +-_2	0.205692					Cylc1 Y- Cylc2+-_4	0.156349		dbKO_5	0.148746
WT_0	0.179426		Cylc1 KO_1	0.154774		Cylc2 +-_2	0.206151					Cylc1 Y- Cylc2+-_4	0.156532		dbKO_5	0.151168
WT_0	0.182261		Cylc1 KO_1	0.154832		Cylc2 +-_2	0.206889					Cylc1 Y- Cylc2+-_4	0.156656		dbKO_5	0.151329
WT_0	0.182908		Cylc1 KO_1	0.15493		Cylc2 +-_2	0.20773					Cylc1 Y- Cylc2+-_4	0.156914		dbKO_5	0.152635
WT_0	0.183061		Cylc1 KO_1	0.155801		Cylc2 +-_2	0.20796					Cylc1 Y- Cylc2+-_4	0.156915		dbKO_5	0.15291
WT_0	0.183281		Cylc1 KO_1	0.155858		Cylc2 +-_2	0.208115					Cylc1 Y- Cylc2+-_4	0.156932		dbKO_5	0.153147
WT_0	0.183671		Cylc1 KO_1	0.156198		Cylc2 +-_2	0.20839					Cylc1 Y- Cylc2+-_4	0.156951		dbKO_5	0.155523
WT_0	0.183975		Cylc1 KO_1	0.156904		Cylc2 +-_2	0.208764					Cylc1 Y- Cylc2+-_4	0.157222		dbKO_5	0.156324
WT_0	0.183983		Cylc1 KO_1	0.157015		Cylc2 +-_2	0.210361					Cylc1 Y- Cylc2+-_4	0.157225		dbKO_5	0.158535
WT_0	0.184255		Cylc1 KO_1	0.157046		Cylc2 +-_2	0.210516					Cylc1 Y- Cylc2+-_4	0.157354		dbKO_5	0.159348
WT_0	0.184295		Cylc1 KO_1	0.157439		Cylc2 +-_2	0.210864					Cylc1 Y- Cylc2+-_4	0.157616		dbKO_5	0.160666
WT_0	0.185836		Cylc1 KO_1	0.157629		Cylc2 +-_2	0.211684					Cylc1 Y- Cylc2+-_4	0.159593		dbKO_5	0.164355
WT_0	0.188081		Cylc1 KO_1	0.157771		Cylc2 +-_2	0.213095					Cylc1 Y- Cylc2+-_4	0.160591		dbKO_5	0.16543
WT_0	0.188834		Cylc1 KO_1	0.157796		Cylc2 +-_2	0.213616					Cylc1 Y- Cylc2+-_4	0.162613		dbKO_5	0.16653
WT_0	0.189261		Cylc1 KO_1	0.158167		Cylc2 +-_2	0.214024					Cylc1 Y- Cylc2+-_4	0.162871		dbKO_5	0.168192
WT_0	0.189288		Cylc1 KO_1	0.158573		Cylc2 +-_2	0.214096					Cylc1 Y- Cylc2+-_4	0.162973		dbKO_5	0.16848
WT_0	0.189823		Cylc1 KO_1	0.159851		Cylc2 +-_2	0.214309					Cylc1 Y- Cylc2+-_4	0.164635		dbKO_5	0.168912
WT_0	0.190408		Cylc1 KO_1	0.159953		Cylc2 +-_2	0.216073					Cylc1 Y- Cylc2+-_4	0.164664		dbKO_5	0.174195
WT_0	0.191278		Cylc1 KO_1	0.160421		Cylc2 +-_2	0.216291					Cylc1 Y- Cylc2+-_4	0.16508		dbKO_5	0.175687
WT_0	0.193411		Cylc1 KO_1	0.160423		Cylc2 +-_2	0.216354					Cylc1 Y- Cylc2+-_4	0.165277		dbKO_5	0.178526
WT_0	0.193507		Cylc1 KO_1	0.160828		Cylc2 +-_2	0.2175					Cylc1 Y- Cylc2+-_4	0.165691		dbKO_5	0.180862
WT_0	0.193642		Cylc1 KO_1	0.162413		Cylc2 +-_2	0.217581					Cylc1 Y- Cylc2+-_4	0.166195		dbKO_5	0.183125
WT_0	0.194632		Cylc1 KO_1	0.162454		Cylc2 +-_2	0.218159					Cylc1 Y- Cylc2+-_4	0.166368		dbKO_5	0.183827
WT_0	0.197396		Cylc1 KO_1	0.162859		Cylc2 +-_2	0.218328					Cylc1 Y- Cylc2+-_4	0.167133		dbKO_5	0.184467
WT_0	0.200113		Cylc1 KO_1	0.162999		Cylc2 +-_2	0.219861					Cylc1 Y- Cylc2+-_4	0.167456		dbKO_5	0.185451
WT_0	0.200763		Cylc1 KO_1	0.163025		Cylc2 +-_2	0.219987					Cylc1 Y- Cylc2+-_4	0.167524		dbKO_5	0.189528
WT_0	0.200864		Cylc1 KO_1	0.163885		Cylc2 +-_2	0.220145					Cylc1 Y- Cylc2+-_4	0.16825		dbKO_5	0.189896
WT_0	0.202285		Cylc1 KO_1	0.164296		Cylc2 +-_2	0.221925					Cylc1 Y- Cylc2+-_4	0.168368		dbKO_5	0.197288
WT_0	0.20331		Cylc1 KO_1	0.164516		Cylc2 +-_2	0.222141					Cylc1 Y- Cylc2+-_4	0.168722		dbKO_5	0.197972
WT_0	0.205285		Cylc1 KO_1	0.16461		Cylc2 +-_2	0.222344					Cylc1 Y- Cylc2+-_4	0.168836		dbKO_5	0.207855
WT_0	0.213067		Cylc1 KO_1	0.16473		Cylc2 +-_2	0.222428					Cylc1 Y- Cylc2+-_4	0.169635		dbKO_5	0.207987
WT_0	0.216262		Cylc1 KO_1	0.16529		Cylc2 +-_2	0.222462					Cylc1 Y- Cylc2+-_4	0.169947		dbKO_5	0.21682
WT_0	0.221592		Cylc1 KO_1	0.165455		Cylc2 +-_2	0.222855					Cylc1 Y- Cylc2+-_4	0.170343		dbKO_5	0.2209
WT_0	0.221965		Cylc1 KO_1	0.165845		Cylc2 +-_2	0.223088					Cylc1 Y- Cylc2+-_4	0.170418		dbKO_5	0.252644
WT_0	0.22284		Cylc1 KO_1	0.166426		Cylc2 +-_2	0.223768					Cylc1 Y- Cylc2+-_4	0.170883		dbKO_5	0.304319
WT_0	0.223401		Cylc1 KO_1	0.166487		Cylc2 +-_2	0.225607					Cylc1 Y- Cylc2+-_4	0.171577		dbKO_5	0.309156
WT_0	0.232828		Cylc1 KO_1	0.166892		Cylc2 +-_2	0.226835					Cylc1 Y- Cylc2+-_4	0.171631		dbKO_5	0.32551
WT_0	0.236105		Cylc1 KO_1	0.167989		Cylc2 +-_2	0.228651					Cylc1 Y- Cylc2+-_4	0.172854		dbKO_5	0.469867
WT_0	0.238243		Cylc1 KO_1	0.168041		Cylc2 +-_2	0.229449					Cylc1 Y- Cylc2+-_4	0.173306
WT_0	0.24012		Cylc1 KO_1	0.169099		Cylc2 +-_2	0.229814					Cylc1 Y- Cylc2+-_4	0.173364
WT_0	0.270743		Cylc1 KO_1	0.169943		Cylc2 +-_2	0.229889					Cylc1 Y- Cylc2+-_4	0.173781
WT_0	0.276772		Cylc1 KO_1	0.170236		Cylc2 +-_2	0.232174					Cylc1 Y- Cylc2+-_4	0.175204
WT_0	0.36605		Cylc1 KO_1	0.170911		Cylc2 +-_2	0.232223					Cylc1 Y- Cylc2+-_4	0.176301
WT_0	0.517195		Cylc1 KO_1	0.170981		Cylc2 +-_2	0.232641					Cylc1 Y- Cylc2+-_4	0.176351
			Cylc1 KO_1	0.170995		Cylc2 +-_2	0.232816					Cylc1 Y- Cylc2+-_4	0.176544
			Cylc1 KO_1	0.171193		Cylc2 +-_2	0.232887					Cylc1 Y- Cylc2+-_4	0.176886
			Cylc1 KO_1	0.171221		Cylc2 +-_2	0.234758					Cylc1 Y- Cylc2+-_4	0.177435
			Cylc1 KO_1	0.1723		Cylc2 +-_2	0.234772					Cylc1 Y- Cylc2+-_4	0.177776
			Cylc1 KO_1	0.172454		Cylc2 +-_2	0.234913					Cylc1 Y- Cylc2+-_4	0.178279
			Cylc1 KO_1	0.172784		Cylc2 +-_2	0.235359					Cylc1 Y- Cylc2+-_4	0.17831
			Cylc1 KO_1	0.172936		Cylc2 +-_2	0.236119					Cylc1 Y- Cylc2+-_4	0.179817
			Cylc1 KO_1	0.17338		Cylc2 +-_2	0.237316					Cylc1 Y- Cylc2+-_4	0.180591
			Cylc1 KO_1	0.173478		Cylc2 +-_2	0.238296					Cylc1 Y- Cylc2+-_4	0.180651
			Cylc1 KO_1	0.173564		Cylc2 +-_2	0.238445					Cylc1 Y- Cylc2+-_4	0.181404
			Cylc1 KO_1	0.174023		Cylc2 +-_2	0.239335					Cylc1 Y- Cylc2+-_4	0.181599
			Cylc1 KO_1	0.174355		Cylc2 +-_2	0.239408					Cylc1 Y- Cylc2+-_4	0.181972
			Cylc1 KO_1	0.17551		Cylc2 +-_2	0.239767					Cylc1 Y- Cylc2+-_4	0.182681
			Cylc1 KO_1	0.17621		Cylc2 +-_2	0.240819					Cylc1 Y- Cylc2+-_4	0.182757
			Cylc1 KO_1	0.17668		Cylc2 +-_2	0.241358					Cylc1 Y- Cylc2+-_4	0.183588
			Cylc1 KO_1	0.17739		Cylc2 +-_2	0.241968					Cylc1 Y- Cylc2+-_4	0.183645
			Cylc1 KO_1	0.177695		Cylc2 +-_2	0.245675					Cylc1 Y- Cylc2+-_4	0.183962
			Cylc1 KO_1	0.178844		Cylc2 +-_2	0.248907					Cylc1 Y- Cylc2+-_4	0.184027
			Cylc1 KO_1	0.179249		Cylc2 +-_2	0.24898					Cylc1 Y- Cylc2+-_4	0.18426
			Cylc1 KO_1	0.179293		Cylc2 +-_2	0.250097					Cylc1 Y- Cylc2+-_4	0.186174
			Cylc1 KO_1	0.179305		Cylc2 +-_2	0.252148					Cylc1 Y- Cylc2+-_4	0.187519
			Cylc1 KO_1	0.179883		Cylc2 +-_2	0.253358					Cylc1 Y- Cylc2+-_4	0.187595
			Cylc1 KO_1	0.180586		Cylc2 +-_2	0.254448					Cylc1 Y- Cylc2+-_4	0.18807
			Cylc1 KO_1	0.180634		Cylc2 +-_2	0.25467					Cylc1 Y- Cylc2+-_4	0.188634
			Cylc1 KO_1	0.181772		Cylc2 +-_2	0.254853					Cylc1 Y- Cylc2+-_4	0.191345
			Cylc1 KO_1	0.181976		Cylc2 +-_2	0.255936					Cylc1 Y- Cylc2+-_4	0.191765
			Cylc1 KO_1	0.1827		Cylc2 +-_2	0.256025					Cylc1 Y- Cylc2+-_4	0.192276
			Cylc1 KO_1	0.182999		Cylc2 +-_2	0.256459					Cylc1 Y- Cylc2+-_4	0.192292
			Cylc1 KO_1	0.183313		Cylc2 +-_2	0.258666					Cylc1 Y- Cylc2+-_4	0.192397
			Cylc1 KO_1	0.183344		Cylc2 +-_2	0.261993					Cylc1 Y- Cylc2+-_4	0.193201
			Cylc1 KO_1	0.183499		Cylc2 +-_2	0.262024					Cylc1 Y- Cylc2+-_4	0.195484
			Cylc1 KO_1	0.183813		Cylc2 +-_2	0.263531					Cylc1 Y- Cylc2+-_4	0.195488
			Cylc1 KO_1	0.184154		Cylc2 +-_2	0.263981					Cylc1 Y- Cylc2+-_4	0.195509
			Cylc1 KO_1	0.184597		Cylc2 +-_2	0.270413					Cylc1 Y- Cylc2+-_4	0.195536
			Cylc1 KO_1	0.184669		Cylc2 +-_2	0.272468					Cylc1 Y- Cylc2+-_4	0.19572
			Cylc1 KO_1	0.185159		Cylc2 +-_2	0.273098					Cylc1 Y- Cylc2+-_4	0.1971
			Cylc1 KO_1	0.185754		Cylc2 +-_2	0.27408					Cylc1 Y- Cylc2+-_4	0.197259
			Cylc1 KO_1	0.186345		Cylc2 +-_2	0.276904					Cylc1 Y- Cylc2+-_4	0.198471
			Cylc1 KO_1	0.186914		Cylc2 +-_2	0.280555					Cylc1 Y- Cylc2+-_4	0.198555
			Cylc1 KO_1	0.186947		Cylc2 +-_2	0.280889					Cylc1 Y- Cylc2+-_4	0.198873
			Cylc1 KO_1	0.187377		Cylc2 +-_2	0.281412					Cylc1 Y- Cylc2+-_4	0.199023
			Cylc1 KO_1	0.187583		Cylc2 +-_2	0.28169					Cylc1 Y- Cylc2+-_4	0.199229
			Cylc1 KO_1	0.188246		Cylc2 +-_2	0.28438					Cylc1 Y- Cylc2+-_4	0.199462
			Cylc1 KO_1	0.188325		Cylc2 +-_2	0.302399					Cylc1 Y- Cylc2+-_4	0.200673
			Cylc1 KO_1	0.18878		Cylc2 +-_2	0.302878					Cylc1 Y- Cylc2+-_4	0.201425
			Cylc1 KO_1	0.189		Cylc2 +-_2	0.305162					Cylc1 Y- Cylc2+-_4	0.20235
			Cylc1 KO_1	0.189244		Cylc2 +-_2	0.306939					Cylc1 Y- Cylc2+-_4	0.20355
			Cylc1 KO_1	0.189992		Cylc2 +-_2	0.339188					Cylc1 Y- Cylc2+-_4	0.205939
			Cylc1 KO_1	0.190129		Cylc2 +-_2	0.379728					Cylc1 Y- Cylc2+-_4	0.206359
			Cylc1 KO_1	0.191452								Cylc1 Y- Cylc2+-_4	0.206383
			Cylc1 KO_1	0.192915								Cylc1 Y- Cylc2+-_4	0.206992
			Cylc1 KO_1	0.193355								Cylc1 Y- Cylc2+-_4	0.208055
			Cylc1 KO_1	0.194912								Cylc1 Y- Cylc2+-_4	0.208337
			Cylc1 KO_1	0.195245								Cylc1 Y- Cylc2+-_4	0.210394
			Cylc1 KO_1	0.195711								Cylc1 Y- Cylc2+-_4	0.210549
			Cylc1 KO_1	0.195886								Cylc1 Y- Cylc2+-_4	0.211535
			Cylc1 KO_1	0.196321								Cylc1 Y- Cylc2+-_4	0.213121
			Cylc1 KO_1	0.196364								Cylc1 Y- Cylc2+-_4	0.213841
			Cylc1 KO_1	0.19796								Cylc1 Y- Cylc2+-_4	0.213955
			Cylc1 KO_1	0.198546								Cylc1 Y- Cylc2+-_4	0.214894
			Cylc1 KO_1	0.19898								Cylc1 Y- Cylc2+-_4	0.214989
			Cylc1 KO_1	0.200301								Cylc1 Y- Cylc2+-_4	0.215279
			Cylc1 KO_1	0.201275								Cylc1 Y- Cylc2+-_4	0.218394
			Cylc1 KO_1	0.202162								Cylc1 Y- Cylc2+-_4	0.22208
			Cylc1 KO_1	0.203195								Cylc1 Y- Cylc2+-_4	0.224756
			Cylc1 KO_1	0.205877								Cylc1 Y- Cylc2+-_4	0.227624
			Cylc1 KO_1	0.206773								Cylc1 Y- Cylc2+-_4	0.229096
			Cylc1 KO_1	0.208075								Cylc1 Y- Cylc2+-_4	0.235619
			Cylc1 KO_1	0.20825								Cylc1 Y- Cylc2+-_4	0.236686
			Cylc1 KO_1	0.209347								Cylc1 Y- Cylc2+-_4	0.240511
			Cylc1 KO_1	0.210376								Cylc1 Y- Cylc2+-_4	0.241435
			Cylc1 KO_1	0.210999								Cylc1 Y- Cylc2+-_4	0.242137
			Cylc1 KO_1	0.211819								Cylc1 Y- Cylc2+-_4	0.247266
			Cylc1 KO_1	0.211972								Cylc1 Y- Cylc2+-_4	0.247807
			Cylc1 KO_1	0.212356								Cylc1 Y- Cylc2+-_4	0.249722
			Cylc1 KO_1	0.21273								Cylc1 Y- Cylc2+-_4	0.253362
			Cylc1 KO_1	0.216376								Cylc1 Y- Cylc2+-_4	0.255098
			Cylc1 KO_1	0.21828								Cylc1 Y- Cylc2+-_4	0.255982
			Cylc1 KO_1	0.221781								Cylc1 Y- Cylc2+-_4	0.256951
			Cylc1 KO_1	0.222323								Cylc1 Y- Cylc2+-_4	0.280124
			Cylc1 KO_1	0.224232								Cylc1 Y- Cylc2+-_4	0.291225
			Cylc1 KO_1	0.224974								Cylc1 Y- Cylc2+-_4	0.301299
			Cylc1 KO_1	0.227615								Cylc1 Y- Cylc2+-_4	0.334433
			Cylc1 KO_1	0.227829								Cylc1 Y- Cylc2+-_4	0.36591
			Cylc1 KO_1	0.231034								Cylc1 Y- Cylc2+-_4	0.42456
			Cylc1 KO_1	0.233288
			Cylc1 KO_1	0.233854
			Cylc1 KO_1	0.238257
			Cylc1 KO_1	0.24098
			Cylc1 KO_1	0.241249
			Cylc1 KO_1	0.246356
			Cylc1 KO_1	0.251405
			Cylc1 KO_1	0.25554
			Cylc1 KO_1	0.273242
			Cylc1 KO_1	0.303178
