# Supplementary material for: Cylicins are a structural component of the sperm calyx being indispensable for male fertility in mice and human
Source: eLife journal article supplement (doi:10.7554/elife.86100), 2023-03-23
Supplement: fig3-data2 [file Sperm motility.xlsx]

## Sheet: sperm motility
		total motile	progressive	non motile		%motile	%progressive	%non motile
9340	WT	404	167	187		68.3587	28.2572	31.6413
415	WT	402	108	181		68.9537	18.5249	31.0463			WT	70.0922
416	WT	224	41	83		72.9642	13.355	27.0358			Cylc1 Y/-	65.5258
9403	C2 +/-	105	13	48		68.6275	8.49673	31.3725			Cylc2 +/-	67.1512
9405	C2 +/-	183	85	91		66.7883	31.0219	33.2117			Cylc2 -/-	7.26924
9489	C2 +/-	280	71	144		66.0377	16.7453	33.9623			C1 Y/-; C2 +/-	27.0522
9487	C2 -/-	16	4	168		8.69565	2.17391	91.3043			C1 Y/-; C2 -/-	2.34137
9488	C2 -/-	8	2	87		8.42105	2.10526	91.5789
9490	C2 -/-	8	0	133		5.67376	0	94.3262
	C2 -/-	12	3	195		5.7971	1.44928	94.2029
9493	C2 -/-	9	1	107		7.75862	0.862069	92.2414
9352	C1 Y/-	308	147	175		63.7681	30.4348	36.2319
9350	C1 Y/-	158	54	74		68.1034	23.2759	31.8966
9598	C1 Y/-	165	29	90		64.7059	11.3725	35.2941
9491	C1 Y/-; C2 +/-	72	10	169		29.8755	4.14938	70.1245
9492	C1 Y/-; C2 +/-	163	18	317		33.9583	3.75	66.0417
9596	C1 Y/-; C2 +/-	24	0	100		19.3548	0	80.6452
9597	C1 Y/-; C2 +/-	122	17	296		29.1866	4.06699	70.8134
9661	C1 Y/-; C2 +/-	46	1	155		22.8856	0.497512	77.1144
9659	C1 Y/-; C2 -/-	5	0	177		2.74725	0	97.2527
9660	C1 Y/-; C2 -/-	3	0	152		1.93548	0	98.0645
