# Supplementary material for: Cylicins are a structural component of the sperm calyx being indispensable for male fertility in mice and human
Source: eLife journal article supplement (doi:10.7554/elife.86100), 2023-03-23
Supplement: fig3-data3 [file Program codes for flagellar beat analysis.docx]

SpermQ software code: <https://github.com/hansenjn/SpermQ>

Code for color-coded flagellar beat figures: <https://github.com/hansenjn/ColorStackByTimeAndProject>
