# Supplementary material for: Cylicins are a structural component of the sperm calyx being indispensable for male fertility in mice and human
Source: eLife journal article supplement (doi:10.7554/elife.86100), 2023-03-23
Supplement: fig5-data1 [file Manchette lenght.xlsx]

## Sheet: Sheet1
WT	Cylc2 +/-	Cylc1 -/Y	Cylc2 KO	C1ko C2+/-	dbKO
73756	53339	69116	120036	82541	68884
73593	75000	69116	89588	75153	54781
57628	61620	56727	101980	74041	93134
70214	70434	84900	90000	71021	79310
69354	80959	70114	83487	54708	88510
67476	73355	86023	87235	77104	100285
80895	66483	66843	100623	83295	72450
67030	78409	77369	86215	77389	80709
71344	82000	65970	94414	60216	111826
59464	75584	105436	98762	73410	90604
90427	76105	58258	100265	61612	85212
68007	106370	50120	99925	92801	106902
69771	76922	58138	76694	74243	58249
72471	77104	67624	93600	82292	105906
73110	71169	75802	87932	73593	121939
53907	70007	98995	79310	83235	89045
70178	66219	119269	80604	77897	83863
81988	67231	100319	84599	77621	97990
83863	51000	77833	86145	101213	100080
88023	56859	75166	143265	74000	100499
85849	70831	100846	96664	69354	84906
83546	74887	80994	101020	87144	77621
81498	73682	81786	108904	89051	130614
100180	56859	63530	109836	84155	77369
92087	66008	69065	105394	110073	89045
88374	68622	67624	91000	96385	102044
57489	80959	71169	109836	62769	92087
99161	84885	109604	100717	116297	80056
74330	78476	81744	112004	79624	72007
108227	77233	73246	106301	97673	119051
92655	84380	58694	139201	101833	707833
63008	79196	52010	135882	81437	101219
81242	75073	50488	103711	76942	127264
88119	81413	78772	101966	99705	82873
100245	82169	97755	94641	94847	112925
77156	97529	97324	108190	85422	107517
94493	78102	87464	117546	95000	87464
88730	62482	72125	101789	77795	110145
97046	74498	67543	102044	101074	88645
99323	66603	57271	120785	97015	114004
96255	85907	70711	81566	105224	93723
95273	60926	66648	109986	117047	89140
64327	70257	61522	82292	95771	105380
85703	75392	95921	76531	92130	94847
64125	79120	101002	106024	80623	108259
81394	75286	78230	99624	76942	101843
75690	85088	79322	112058	76577	105394
82037	77231	73430	78313	96187	129800
95635	84095	74000	101100	84599	106677
84717	85180	80000	112606	98184	110
66603	90000	78588	96628	102703	114769
84876	89023	75180	112508	102956
91137	84120	79246	103763	104690
81498	85454	100896	96840
72250	82400	86764	81154
64921	93862	99045	87052
75073	93005	91548	109000
78816		81541	104547
84095			117324
66354			119013
52612			93105
72000			110015
88023			99459
84119			99247
84404			110145
82462			142801
90510
79246
100319
99298
80271.8	76252.7	78030.8	101437	86124.8	105977
