# Supplementary material for: Cylicins are a structural component of the sperm calyx being indispensable for male fertility in mice and human
Source: eLife journal article supplement (doi:10.7554/elife.86100), 2023-03-23
Supplement: fig6-data1 [file CodeML_results_table.xlsx]

## Sheet: Cylc_table
Table X: Results of the evolutionary analysis using CodeML (PAML4.9).
Selection on:	Gene / Clade		LnL null model	LnL alternative model	LRT	p	ω	interpretation
whole sequence, whole tree	Cylc1		16829.72 (M0)	16836.43 (M0fix)	13.4324	>0.001	0.85 (M0)	overall weakly conserved
	Cylc2		9104.23 (M0)	9173.54 (M0fix)	138.616	>0.001	0.49 (M0)	overall conserved
whole sequence, clades / lineages	Cylc1	Primates	16829.72 (M0)	16828.78 (MC)	1.88625	n.s.	0.79 (MC)	both lineages equally weakly conserved
		Rodentia					0.89 (MC)
	Cylc2	Primates	9104.23 (M0)	9101.45 (MC)	5.56441	n.s.	0.59 (MC)	both lineages equally conserved
		Rodentia					0.44 (MC)
codon sites, whole tree	Cylc1		16683.85 (M1a)	16652.44 (M2a)	62.8315	<0.001	n.a.	prop 0	prop 1	prop 2a	PSS	PUR
								0.34017	0.5125	0.14733	196S,235D,469N	1M,58V,77I,114E,181E,234D,269N,273N,274N,276K,277K,280K,288K,291S,295S,299K,306K,307K,322K,343K,347K,386K,404E,410K,417K,421K,459K,468K,472S,485K,524K,553K,556F,580C,595C,603K,615I,616H,617K
	Cylc2		8815.38 (M1a)	8776.98 (M2a)	76.815	<0.001	n.a.	prop 0	prop 1	prop 2a	PSS	PUR
								0.47379	0.44033	0.08588	103H,104F,105G,113G,117T,131A,164A,188S,192A,218-,260V	1M,4P,5R,7L,10T,12G,14Y,15D,16N,17Y,19P,20V,22E,23L,25K,27S,29N,30Q,31Q,33F,37F,39K,40P,42R,43P,44G,48R,53Q,57N,63D,64E,73P,74L,76M,81M,82R,83I,85E,86R,87P,89V,90Y,91L,92A,93A,94R,100K,110K,119K,128G,130E,132K,141K,142K,147K,152E,156E,162K,165K,169K,175K,180E,182G,184E,190K,193K,196K,197K,207-,209-,211-,212-,215-,216-,229K,234E,236G,238E,239K,244K,250K,251K,257K,264A,266E,267K,273-,277-,279-,285K…
LnL = log Likelihood value of the model; LRT = Likelihood Ratio Test; p = p-value of the LRT; ω = evolutionary rate (dN/dS); prop = proportion of sites assigned to the respective site class; PSS = positively selected sites; PUR = sites under purifying selection / conserved sites; for explanation of the models see M&M.
